# Supplementary material
Source: Royal Society of Chemistry journal article supplement (doi:10.1039/d6cp00474a)
Supplement: d6cp00474a1.pdf [file d6cp00474a1.pdf]

# Supplementary Information

## Capture and Complexation of Carbon Monoxide Using NHC and Its Boron Analogs: A Computational Study

Aswathy Jayaprakash,<sup>a</sup> Anna Jose<sup>a</sup> and Elambalassery G. Jayasree<sup>\*a</sup>

<sup>a</sup>*Department of Applied Chemistry, Cochin University of Science and Technology, Kochi -  
682022, Kerala, India.*

All possible conformers arising from different orientations of substituents such as NH<sub>2</sub>(inward or outward due to pyramidal geometry), CHO, and COOH were fully optimized. The electronic energies in a.u of these conformers for **1X** complexes are listed below to confirm the identification of the global minimum structures discussed in the main text. The conformer selected for further analysis(global minimum) is highlighted in bold.

### **1NH<sub>2</sub> – CO – 1NH<sub>2</sub>**

-786.78839789, -786.79830606, -786.80897676, -786.81315588, -786.81373867, -786.80093121, -786.79810997, -786.79035764, -786.80207426, **-786.81437558**, -786.80260335, -786.80874886

### **1COOH – CO – 1COOH**

**-1319.82662474**, -1319.82509029... In all other configurations, the COOH group from the NHC ring connected to O atom is dislocated.

### **1CHO – CO – 1CHO**

-1018.82360597, -1018.83528748, -1018.85168740, -1018.85510927, -1018.82946501, -1018.85939630, -1018.79167999, -1018.85759350, -1018.83946542, -1018.81651044, -1018.85642412, **-1018.86291643**, -1018.81983973, -1018.83714702, -1018.80960120, -1018.80995211

### **1NO<sub>2</sub> – CO – 1NH<sub>2</sub>**

-1085.12836168, -1085.12098714, -1085.12497587, **-1085.13100452**, -1085.06737775, -1085.07836049, -1085.07836049, -1085.06737769

### **1CHO – CO – 1CH<sub>3</sub>**

-870.82617780, -870.81864161, -870.81915297, **-870.82743115**

### **1CHO – CO – 1NH<sub>2</sub>**

-902.82323127, -902.80166536, -902.80271120, -902.82320036, -902.81481644, -902.82325089, -902.79995166, -902.79301671, -902.77809114, -902.80188051, -902.81044001, -902.78844062, -902.81105140, -902.81219885, -902.85662677, -902.86074652, -902.85422618, -902.85189484, -902.84661124, -902.85212853, -902.85180907, -902.85518484,

-902.84554352, -902.85212859, -902.83598047, **-902.86250369**, -902.85518454, -  
902.85189485, -902.85662683

**1COOH – CO – 1CH<sub>3</sub>**

-1021.30853768, -1021.30458571, -1021.30459438, **-1021.30903568**

**1COOH – CO – 1NH<sub>2</sub>**

-1053.34369103, -1053.33498174, -1053.33449641, -1053.32695892, -1053.32712296, -  
1053.33493648, -1053.33646216, -1053.33068131, -1053.33068131, -1053.33806127, -  
1053.33776148, -1053.34302302, **-1053.34470905**, -1053.33634983

**Table S1: Calculated bond distance, NBO partial charges and Wiberg bond indices (WBI) for free CO and all its complexes with 1X and 2X, along with stabilization energies. Atom numbering corresponds to that shown in Scheme 1.**

| SYSTEM                                   | Stabilization Energy (kcal/mol) | Bond distance (Å)<br>C2-O3 | WBI C2-O3 | WBI C1-C2/<br>B1-C2 | WBI O3-C4/<br>O3-B4 | q(C1)/<br>q(B1)<br>(e) | q(C2)<br>(e) | q(O3)<br>(e) | q(C4)/<br>q(B4)<br>(e) |
|------------------------------------------|---------------------------------|----------------------------|-----------|---------------------|---------------------|------------------------|--------------|--------------|------------------------|
| CO                                       | -                               | 1.12                       | 2.27      | -                   | -                   | -                      | 0.49         | -0.49        | -                      |
| 1H-CO-1H                                 | 21.54                           | 1.55                       | 0.67      | 1.77                | 1.25                | 0.23                   | -0.36        | -0.55        | 0.82                   |
| 1CH <sub>3</sub> – CO – 1CH <sub>3</sub> | 32.39                           | 1.54                       | 0.68      | 1.78                | 1.24                | 0.23                   | -0.34        | -0.56        | 0.86                   |
| 1NH <sub>2</sub> – CO – 1NH <sub>2</sub> | 22.89                           | 1.52                       | 0.71      | 1.83                | 1.18                | 0.22                   | -0.28        | -0.56        | 0.88                   |
| 1COOH – CO – 1COOH                       | 15.00                           | 1.49                       | 0.73      | 1.85                | 1.27                | 0.19                   | -0.10        | -0.49        | 0.91                   |
| 1CHO – CO – 1CHO                         | 11.13                           | 1.46                       | 0.77      | 1.80                | 1.26                | 0.24                   | -0.22        | -0.48        | 0.88                   |
| 1NO <sub>2</sub> – CO – 1NO <sub>2</sub> | 28.32                           | 1.51                       | 0.70      | 1.80                | 1.32                | 0.14                   | -0.04        | -0.46        | 0.87                   |
| 1NO <sub>2</sub> – CO – 1CH <sub>3</sub> | 0.42                            | 1.48                       | 0.75      | 1.80                | 1.17                | 0.09                   | -0.01        | -0.55        | 0.85                   |
| 1NO <sub>2</sub> – CO – 1NH <sub>2</sub> | 0.40                            | 1.49                       | 0.74      | 1.81                | 1.17                | 0.09                   | -0.03        | -0.56        | 0.83                   |
| 1CHO – CO – 1CH <sub>3</sub>             | 4.64                            | 1.48                       | 0.74      | 1.84                | 1.19                | 0.18                   | -0.14        | -0.54        | 0.87                   |
| 1CHO – CO – 1NH <sub>2</sub>             | 1.52                            | 1.48                       | 0.77      | 1.84                | 1.16                | 0.21                   | -0.19        | -0.54        | 0.81                   |

|                                          |        |      |      |      |      |      |       |       |      |
|------------------------------------------|--------|------|------|------|------|------|-------|-------|------|
| 1COOH – CO – 1CH <sub>3</sub>            | 8.44   | 1.50 | 0.72 | 1.84 | 1.19 | 0.17 | -0.11 | -0.55 | 0.86 |
| 1COOH – CO – 1NH <sub>2</sub>            | 5.01   | 1.48 | 0.76 | 1.84 | 1.17 | 0.21 | -0.16 | -0.54 | 0.82 |
| 2H – CO – 2H                             | 0.58   | 1.32 | 1.21 | 1.03 | 0.77 | 0.57 | -0.02 | -0.71 | 0.99 |
| 2CH <sub>3</sub> – CO – 2CH <sub>3</sub> | 3.92   | 1.40 | 0.99 | 1.17 | 0.85 | 0.64 | -0.26 | -0.77 | 1.11 |
| 2NH <sub>2</sub> – CO – 2NH <sub>2</sub> | 8.91   | 1.50 | 0.78 | 1.56 | 0.98 | 0.52 | -0.68 | -0.83 | 1.06 |
| 2CHO – CO – 2CHO                         | -4.24  | 1.53 | 0.74 | 1.80 | 1.13 | 0.54 | -0.74 | -0.78 | 1.16 |
| 2NO <sub>2</sub> – CO – 2NO <sub>2</sub> | 2.65   | 1.41 | 0.84 | 1.76 | 1.16 | 0.40 | -0.37 | -0.66 | 1.08 |
| 2NO <sub>2</sub> – CO – 2CH <sub>3</sub> | -11.39 | 1.45 | 0.85 | 1.67 | 0.98 | 0.39 | -0.47 | -0.79 | 1.12 |
| 2NO <sub>2</sub> – CO – 2NH <sub>2</sub> | -14.34 | 1.46 | 0.84 | 1.66 | 0.96 | 0.42 | -0.49 | -0.79 | 1.07 |
| 2CHO – CO – 2CH <sub>3</sub>             | -0.88  | 1.49 | 0.78 | 1.82 | 1.00 | 0.47 | -0.69 | -0.82 | 1.13 |
| 2CHO – CO – 2NH <sub>2</sub>             | -5.19  | 1.52 | 0.78 | 1.78 | 1.02 | 0.50 | -0.66 | -0.80 | 1.03 |
| 2COOH – CO – 2CH <sub>3</sub>            | 3.97   | 1.48 | 0.80 | 1.85 | 1.01 | 0.44 | -0.61 | -0.80 | 1.12 |
| 2COOH – CO – 2NH <sub>2</sub>            | -0.97  | 1.54 | 0.73 | 1.81 | 0.96 | 0.48 | -0.62 | -0.81 | 1.07 |
| 1H – CO – 2H                             | -58.67 | 1.47 | 0.81 | 1.86 | 0.95 | 0.15 | -0.28 | -0.80 | 1.09 |
| 1CH <sub>3</sub> – CO – 2CH <sub>3</sub> | -53.06 | 1.45 | 0.83 | 1.85 | 0.94 | 0.17 | -0.26 | -0.80 | 1.13 |
| 1NH <sub>2</sub> – CO – 2NH <sub>2</sub> | -62.08 | 1.45 | 0.84 | 1.84 | 0.91 | 0.14 | -0.26 | -0.80 | 1.07 |
| 1COOH – CO – 2COOH                       | -53.90 | 1.46 | 0.81 | 1.81 | 1.02 | 0.15 | -0.09 | -0.77 | 1.23 |
| 1CHO – CO – 2CHO                         | -77.74 | 1.42 | 0.87 | 1.81 | 0.98 | 0.16 | -0.14 | -0.75 | 1.19 |
| 1NO <sub>2</sub> – CO – 2NO <sub>2</sub> | -72.29 | 1.42 | 0.83 | 1.75 | 1.07 | 0.06 | 0.07  | -0.73 | 1.17 |
| 1NO <sub>2</sub> – CO – 2CH <sub>3</sub> | -99.85 | 1.40 | 0.94 | 1.69 | 0.87 | 0.05 | -0.00 | -0.76 | 1.12 |
| 1NO <sub>2</sub> – CO – 2NH <sub>2</sub> | -97.19 | 1.40 | 0.94 | 1.70 | 0.87 | 0.06 | -0.02 | -0.76 | 1.06 |
| 1CHO – CO – 2CH <sub>3</sub>             | -91.00 | 1.42 | 0.88 | 1.82 | 0.89 | 0.16 | -0.16 | -0.79 | 1.12 |
| 1CHO – CO – 2NH <sub>2</sub>             | -88.28 | 1.43 | 0.88 | 1.81 | 0.89 | 0.17 | -0.18 | -0.78 | 1.06 |
| 1COOH – CO – 2CH <sub>3</sub>            | -82.62 | 1.41 | 0.90 | 1.79 | 0.90 | 0.12 | -0.08 | -0.77 | 1.12 |
| 1COOH – CO – 2NH <sub>2</sub>            | -81.69 | 1.42 | 0.90 | 1.79 | 0.89 | 0.13 | -0.10 | -0.77 | 1.06 |

**Table S2: Electron Localization Function values at the bond critical points of CO, C-C/B-C, and O-C/O-B bonds for free CO and its most stable complexes with 1X and 2X.**

| SYSTEM                                   | Electron Localization Function (ELF) |             |             |
|------------------------------------------|--------------------------------------|-------------|-------------|
|                                          | C2-O3                                | C1-C2/B1-C2 | O3-C4/O3-B4 |
| CO                                       | 0.39                                 | -           | -           |
| 1NO <sub>2</sub> – CO – 1CH <sub>3</sub> | 0.41                                 | 0.92        | 0.54        |
| 1NO <sub>2</sub> – CO – 1NH <sub>2</sub> | 0.42                                 | 0.92        | 0.54        |
| 2H – CO – 2H                             | 0.38                                 | 0.62        | 0.21        |
| 2CHO – CO – 2CHO                         | 0.41                                 | 0.50        | 0.22        |
| 2NO <sub>2</sub> – CO – 2CH <sub>3</sub> | 0.39                                 | 0.51        | 0.22        |
| 2NO <sub>2</sub> – CO – 2NH <sub>2</sub> | 0.41                                 | 0.50        | 0.26        |
| 2CHO – CO – 2CH <sub>3</sub>             | 0.41                                 | 0.49        | 0.22        |
| 2CHO – CO – 2NH <sub>2</sub>             | 0.44                                 | 0.49        | 0.22        |
| 2COOH – CO – 2NH <sub>2</sub>            | 0.46                                 | 0.49        | 0.22        |
| 1H – CO – 2H                             | 0.43                                 | 0.90        | 0.22        |
| 1CH <sub>3</sub> – CO – 2CH <sub>3</sub> | 0.44                                 | 0.91        | 0.19        |
| 1NH <sub>2</sub> – CO – 2NH <sub>2</sub> | 0.47                                 | 0.92        | 0.19        |
| 1COOH – CO – 2COOH                       | 0.42                                 | 0.92        | 0.20        |
| 1CHO – CO – 2CHO                         | 0.41                                 | 0.91        | 0.19        |
| 1NO <sub>2</sub> – CO – 2NO <sub>2</sub> | 0.36                                 | 0.92        | 0.18        |
| 1NO <sub>2</sub> – CO – 2CH <sub>3</sub> | 0.42                                 | 0.93        | 0.19        |
| 1NO <sub>2</sub> – CO – 2NH <sub>2</sub> | 0.48                                 | 0.93        | 0.23        |
| 1CHO – CO – 2CH <sub>3</sub>             | 0.43                                 | 0.91        | 0.19        |
| 1CHO – CO – 2NH <sub>2</sub>             | 0.44                                 | 0.91        | 0.19        |
| 1COOH – CO – 2CH <sub>3</sub>            | 0.43                                 | 0.92        | 0.19        |
| 1COOH – CO – 2NH <sub>2</sub>            | 0.45                                 | 0.92        | 0.19        |

**Table S3: Electron density  $\rho(r)$  and energy density  $H(r)$  values for C-O, C-C/B-C, and O-C/O-B bonds for free CO and its most stable complexes with 1X and 2X.**

| SYSTEM                                   | $\rho(r_{C-O})$ | $H(r_{C-O})$ | $\rho(r_{C-C/B-C})$ | $H(r_{C-C/B-C})$ | $\rho(r_{O-C/O-B})$ | $H(r_{O-C/O-B})$ |
|------------------------------------------|-----------------|--------------|---------------------|------------------|---------------------|------------------|
| CO                                       | 0.487           | -0.852       | -                   | -                | -                   | -                |
| 1NO <sub>2</sub> – CO – 1CH <sub>3</sub> | 0.194           | -0.234       | 0.341               | -0.398           | 0.347               | -0.542           |
| 1NO <sub>2</sub> – CO – 1NH <sub>2</sub> | 0.192           | -0.230       | 0.341               | -0.399           | 0.348               | -0.544           |
| 2H – CO – 2H                             | 0.287           | -0.407       | 0.188               | -0.196           | 0.182               | -0.138           |
| 2CHO – CO – 2CHO                         | 0.167           | -0.179       | 0.219               | -0.242           | 0.243               | -0.218           |
| 2NO <sub>2</sub> – CO – 2CH <sub>3</sub> | 0.211           | -0.265       | 0.216               | -0.238           | 0.222               | -0.191           |
| 2NO <sub>2</sub> – CO – 2NH <sub>2</sub> | 0.207           | -0.256       | 0.217               | -0.239           | 0.220               | -0.188           |
| 2CHO – CO – 2CH <sub>3</sub>             | 0.182           | -0.208       | 0.219               | -0.241           | 0.226               | -0.196           |
| 2CHO – CO – 2NH <sub>2</sub>             | 0.179           | -0.200       | 0.219               | -0.241           | 0.225               | -0.195           |
| 2COOH – CO – 2NH <sub>2</sub>            | 0.170           | -0.180       | 0.217               | -0.237           | 0.219               | -0.186           |
| 1H – CO – 2H                             | 0.205           | -0.254       | 0.336               | -0.403           | 0.216               | -0.182           |
| 1CH <sub>3</sub> – CO – 2CH <sub>3</sub> | 0.212           | -0.273       | 0.324               | -0.344           | 0.208               | -0.128           |
| 1NH <sub>2</sub> – CO – 2NH <sub>2</sub> | 0.212           | -0.271       | 0.326               | -0.343           | 0.205               | -0.126           |
| 1COOH – CO – 2COOH                       | 0.205           | -0.259       | 0.329               | -0.348           | 0.228               | -0.146           |
| 1CHO – CO – 2CHO                         | 0.225           | -0.307       | 0.329               | -0.353           | 0.219               | -0.137           |
| 1NO <sub>2</sub> – CO – 2NO <sub>2</sub> | 0.217           | -0.293       | 0.330               | -0.345           | 0.227               | -0.138           |
| 1NO <sub>2</sub> – CO – 2CH <sub>3</sub> | 0.245           | -0.352       | 0.326               | -0.338           | 0.198               | -0.119           |
| 1NO <sub>2</sub> – CO – 2NH <sub>2</sub> | 0.249           | -0.334       | 0.332               | -0.373           | 0.203               | -0.168           |
| 1CHO – CO – 2CH <sub>3</sub>             | 0.227           | -0.310       | 0.327               | -0.355           | 0.200               | -0.121           |
| 1CHO – CO – 2NH <sub>2</sub>             | 0.226           | -0.306       | 0.328               | -0.355           | 0.201               | -0.122           |
| 1COOH – CO – 2CH <sub>3</sub>            | 0.234           | -0.325       | 0.328               | -0.347           | 0.203               | -0.124           |
| 1COOH – CO – 2NH <sub>2</sub>            | 0.235           | -0.326       | 0.328               | -0.350           | 0.202               | -0.123           |

**Table S4: Stabilization energies (kcal/mol) for complexes of CO with 1X and 2X ligands in the presence of different protic, aprotic, and non-polar solvents, including water.**

| Complex                                       | Stabilization Energy in different solvents<br>(kcal/mol) |               |               |               |
|-----------------------------------------------|----------------------------------------------------------|---------------|---------------|---------------|
|                                               | Methanol                                                 | THF           | Toluene       | Water         |
| <b>2H – CO – 2H</b>                           | <b>-40.79</b>                                            | <b>-31.73</b> | <b>-10.02</b> | <b>-42.45</b> |
| <b>2CHO – CO – 2CHO</b>                       | <b>-58.86</b>                                            | <b>-53.37</b> | <b>-38.87</b> | <b>-59.67</b> |
| <b>2NO<sub>2</sub> – CO – 2CH<sub>3</sub></b> | <b>-69.56</b>                                            | <b>-63.79</b> | <b>-49.03</b> | <b>-70.66</b> |
| <b>2NO<sub>2</sub> – CO – 2NH<sub>2</sub></b> | <b>-70.28</b>                                            | <b>-65.03</b> | <b>-51.07</b> | <b>-71.21</b> |
| <b>2CHO – CO – 2NH<sub>2</sub></b>            | <b>-59.96</b>                                            | <b>-54.58</b> | <b>-40.36</b> | <b>-60.92</b> |
| <b>2COOH – CO – 2NH<sub>2</sub></b>           | <b>-60.88</b>                                            | <b>-56.23</b> | <b>-34.72</b> | <b>-62.36</b> |
| <b>1H – CO – 2H</b>                           | <b>-52.34</b>                                            | <b>-53.98</b> | <b>-58.36</b> | <b>-52.07</b> |
| <b>1CH<sub>3</sub> – CO – 2CH<sub>3</sub></b> | <b>-47.21</b>                                            | <b>-47.56</b> | <b>-53.33</b> | <b>46.96</b>  |
| <b>1NH<sub>2</sub> – CO – 2NH<sub>2</sub></b> | <b>-54.13</b>                                            | <b>-56.31</b> | <b>-61.88</b> | <b>-53.76</b> |
| <b>1COOH – CO – 2COOH</b>                     | <b>-57.75</b>                                            | <b>-57.92</b> | <b>-59.36</b> | <b>-57.75</b> |
| <b>1CHO – CO – 2CHO</b>                       | <b>-71.27</b>                                            | <b>-73.19</b> | <b>-77.96</b> | <b>-70.93</b> |
| <b>1NO<sub>2</sub> – CO – 2NO<sub>2</sub></b> | <b>-71.45</b>                                            | <b>-72.86</b> | <b>-76.31</b> | <b>-71.20</b> |
| <b>1NO<sub>2</sub> – CO – 2CH<sub>3</sub></b> | <b>-89.55</b>                                            | <b>-92.36</b> | <b>-99.90</b> | <b>-88.99</b> |
| <b>1NO<sub>2</sub> – CO – 2NH<sub>2</sub></b> | <b>-86.84</b>                                            | <b>-89.80</b> | <b>-96.74</b> | <b>-86.30</b> |
| <b>1CHO – CO – 2CH<sub>3</sub></b>            | <b>-78.98</b>                                            | <b>-82.37</b> | <b>-89.90</b> | <b>-78.40</b> |
| <b>1CHO – CO – 2NH<sub>2</sub></b>            | <b>-76.92</b>                                            | <b>-79.86</b> | <b>-86.74</b> | <b>-76.38</b> |
| <b>1COOH – CO – 2CH<sub>3</sub></b>           | <b>-72.54</b>                                            | <b>-75.18</b> | <b>-81.83</b> | <b>-72.10</b> |
| <b>1COOH – CO – 2NH<sub>2</sub></b>           | <b>-71.62</b>                                            | <b>-73.99</b> | <b>-80.19</b> | <b>-71.23</b> |

**Figure S1: Computed structures of CO complexes with 1X and 2X ligands.**

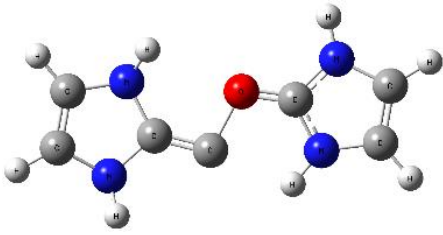

**1H - CO - 1H**

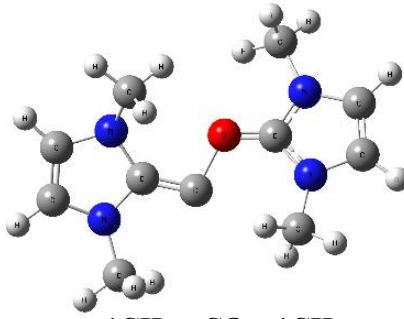

**1CH<sub>3</sub> - CO - 1CH<sub>3</sub>**

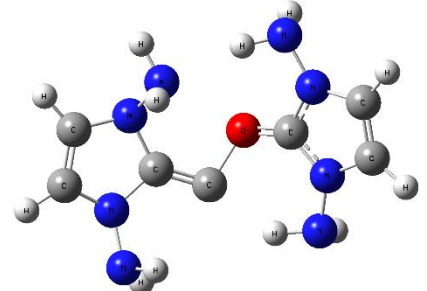

**1NH<sub>2</sub> - CO - 1NH<sub>2</sub>**

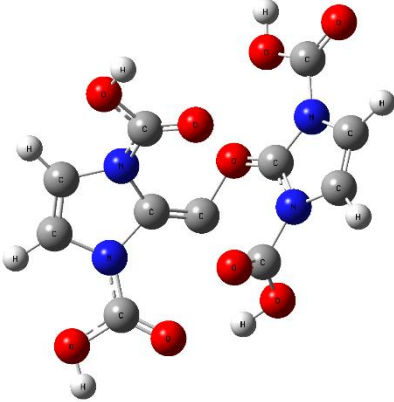

**1COOH - CO - 1COOH**

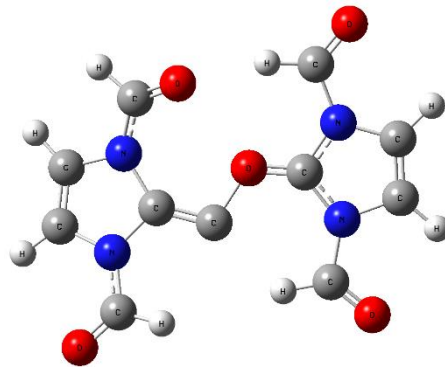

**1CHO - CO - 1CHO**

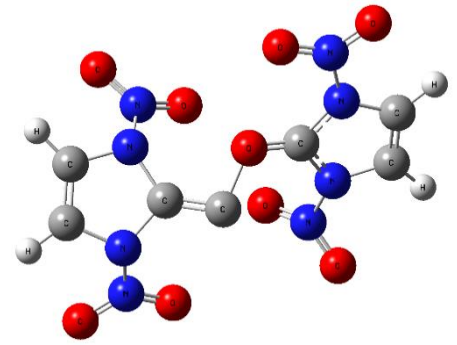

**1NO<sub>2</sub> - CO - 1NO<sub>2</sub>**

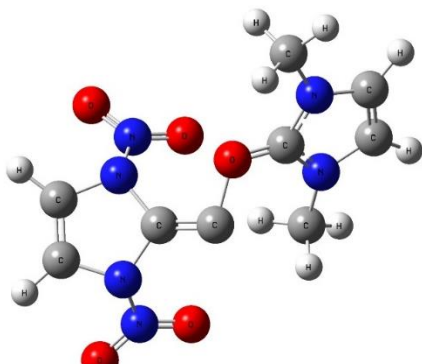

**1NO<sub>2</sub> - CO - 1CH<sub>3</sub>**

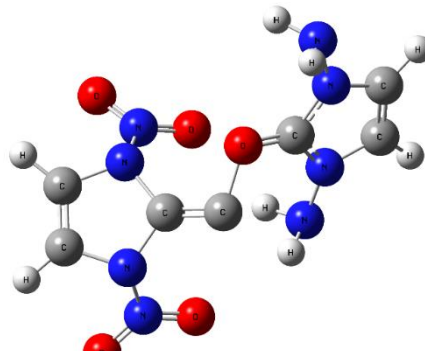

**1NO<sub>2</sub> - CO - 1NH<sub>2</sub>**

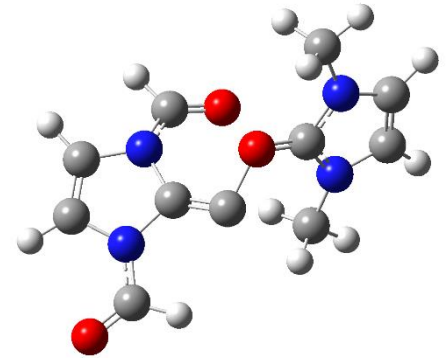

**1CHO - CO - 1CH<sub>3</sub>**

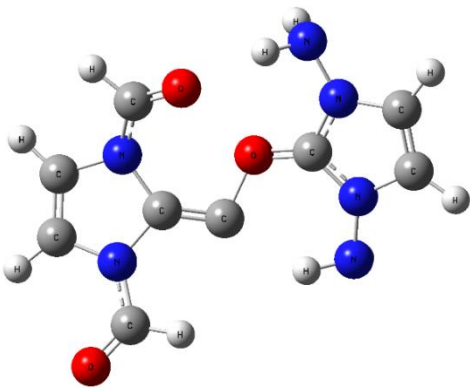

**1CHO - CO - 1NH<sub>2</sub>**

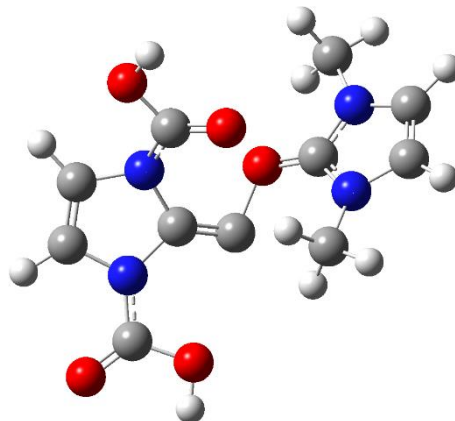

**1COOH - CO - 1CH<sub>3</sub>**

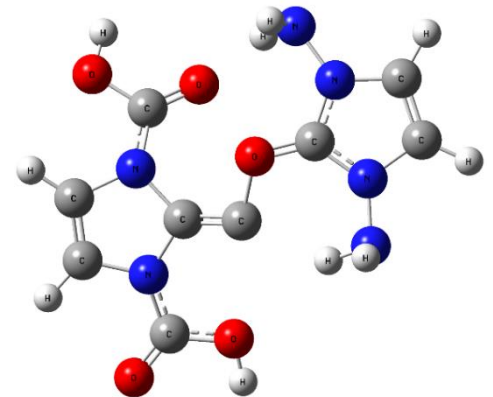

**1COOH - CO - 1NH<sub>2</sub>**

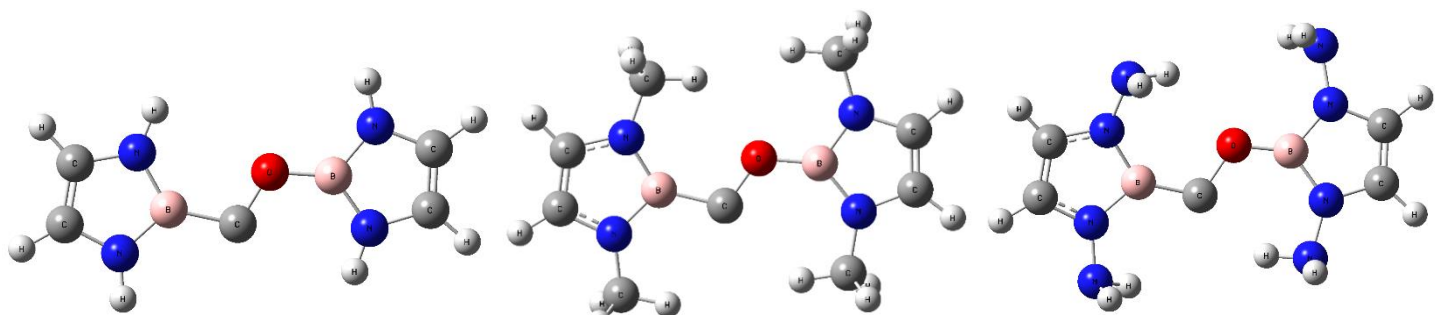

$2\text{H} - \text{CO} - 2\text{H}$

$2\text{CH}_3 - \text{CO} - 2\text{CH}_3$

$2\text{NH}_2 - \text{CO} - 2\text{NH}_2$

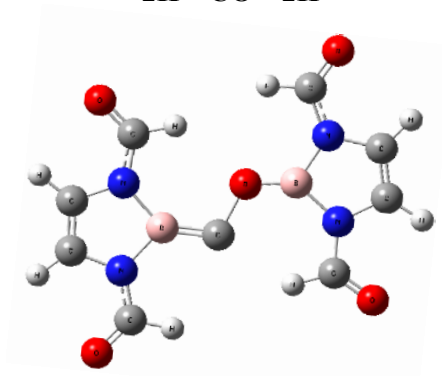

$2\text{CHO} - \text{CO} - 2\text{CHO}$

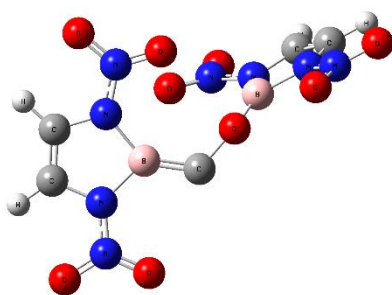

$2\text{NO}_2 - \text{CO} - 2\text{NO}_2$

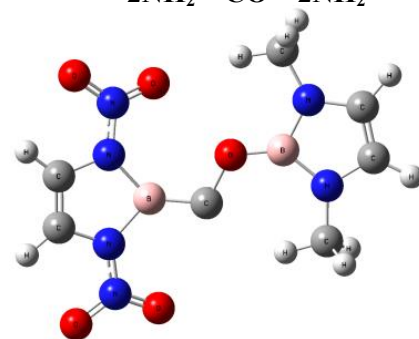

$2\text{NO}_2 - \text{CO} - 2\text{CH}_3$

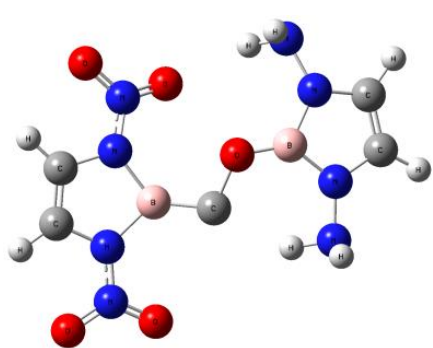

$2\text{NO}_2 - \text{CO} - 2\text{NH}_2$

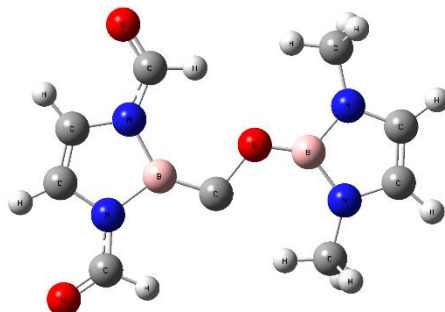

$2\text{CHO} - \text{CO} - 2\text{CH}_3$

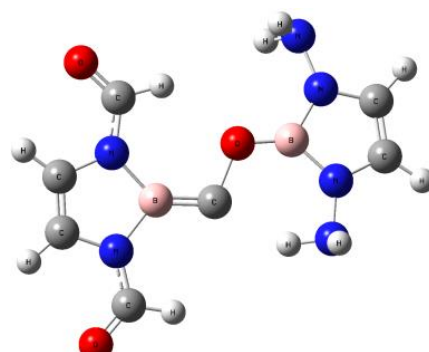

$2\text{CHO} - \text{CO} - 2\text{NH}_2$

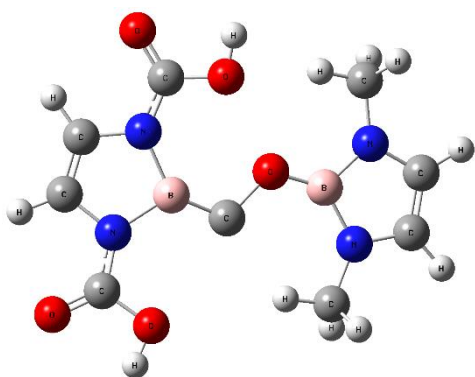

$2\text{COOH} - \text{CO} - 2\text{CH}_3$

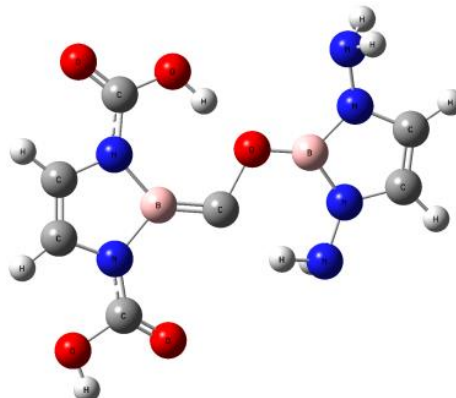

$2\text{COOH} - \text{CO} - 2\text{NH}_2$

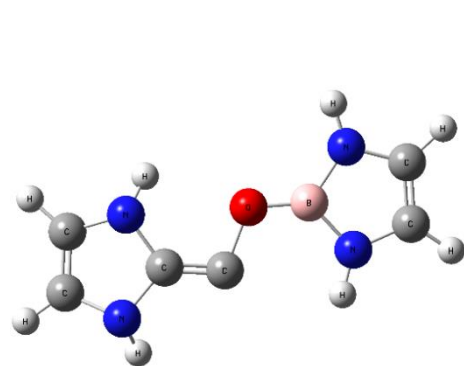

**1H - CO - 2H**

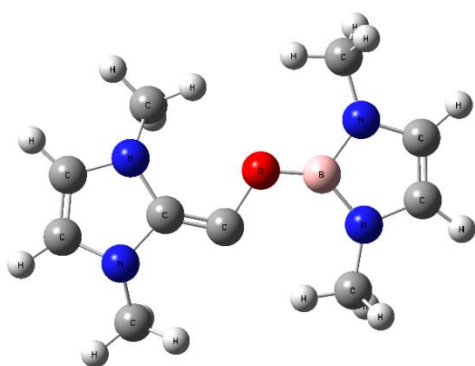

**1CH<sub>3</sub> - CO - 2CH<sub>3</sub>**

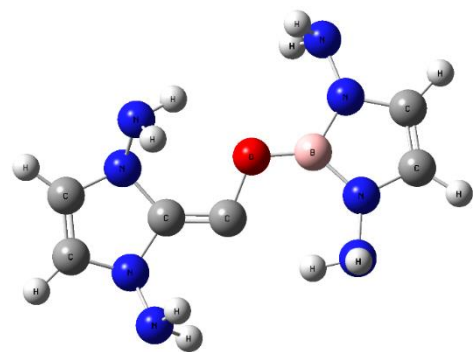

**1NH<sub>2</sub> - CO - 2NH<sub>2</sub>**

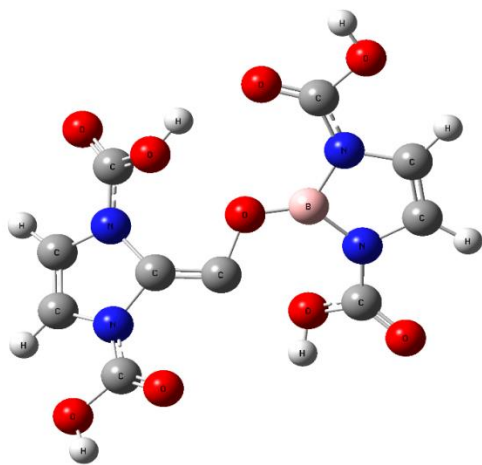

**1COOH - CO - 2COOH**

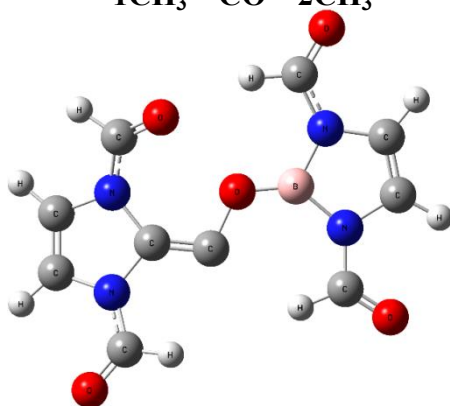

**1CHO - CO - 2CHO**

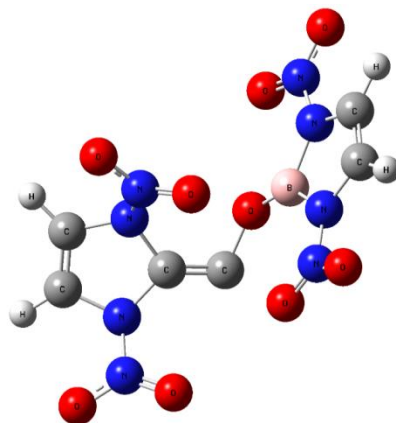

**1NO<sub>2</sub> - CO - 2NO<sub>2</sub>**

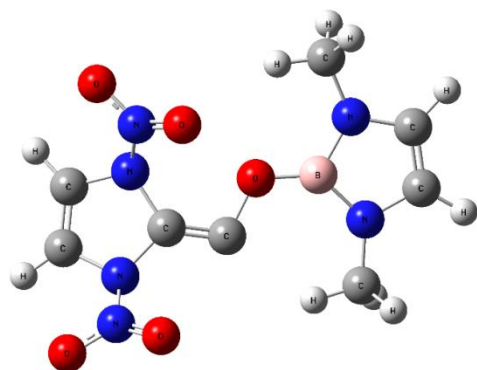

**1NO<sub>2</sub> - CO - 2CH<sub>3</sub>**

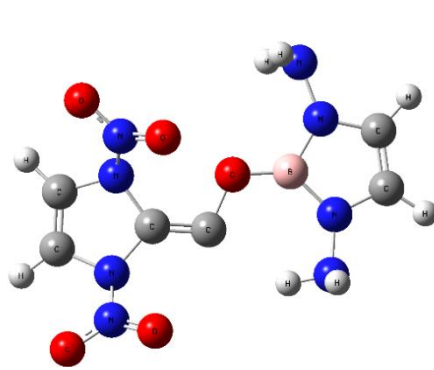

**1NO<sub>2</sub> - CO - 2NH<sub>2</sub>**

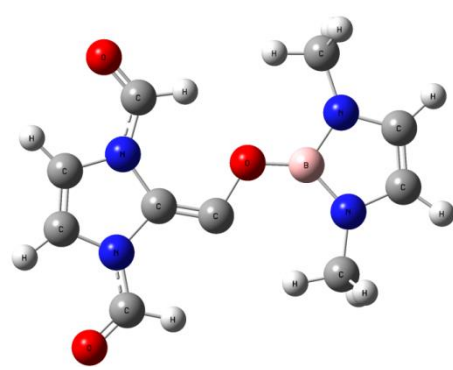

**1CHO - CO - 2CH<sub>3</sub>**

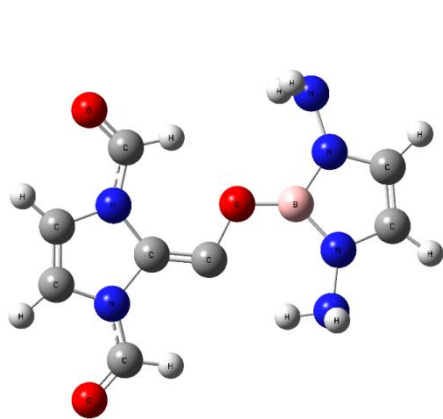

**1CHO - CO - 2NH<sub>2</sub>**

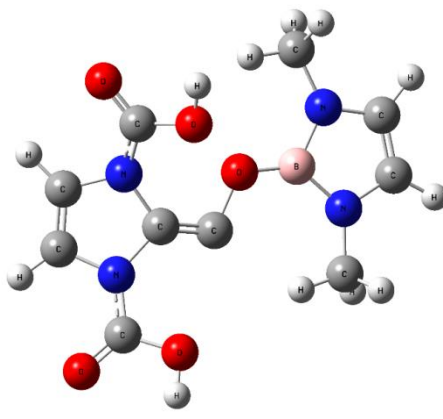

**1COOH - CO - 2CH<sub>3</sub>**

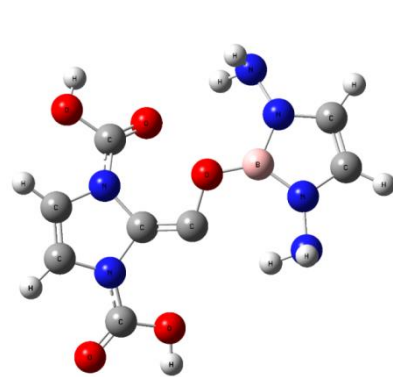

**1COOH - CO - 2NH<sub>2</sub>**

**Figure S2: Electron Localization Function (ELF) plots of the CO unit in the complex  $1\text{NO}_2 - \text{CO} - 1\text{CH}_3$ . The C-C-O and C-O-C bonding regions are shown separately because they lie in different molecular planes.**

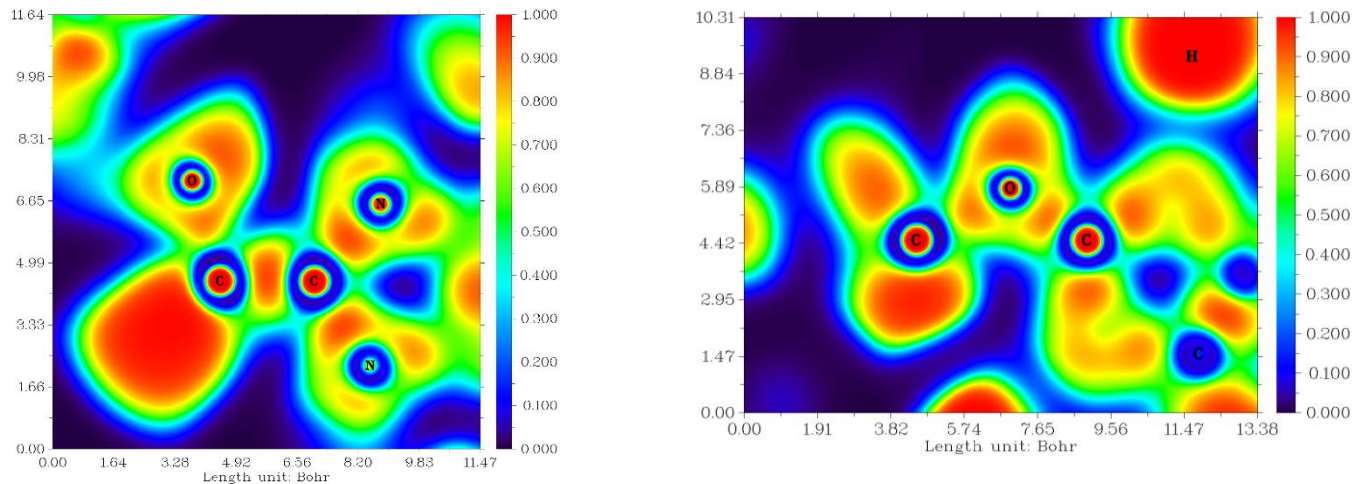

**Figure S3: CDA orbital interaction diagrams for the complex  $2\text{NO}_2 - \text{CO} - 2\text{NH}_2$ . The diagrams represent pairwise fragment interactions: (a) CO (Frag. 1) with  $2\text{NH}_2$  (Frag. 2), and (b)  $2\text{NO}_2$  (Frag. 3) with CO (Frag. 1). Red lines indicate orbital mixing between fragments, and the percentage values represent the contribution of each fragment orbital to the corresponding molecular orbitals of the complex.**

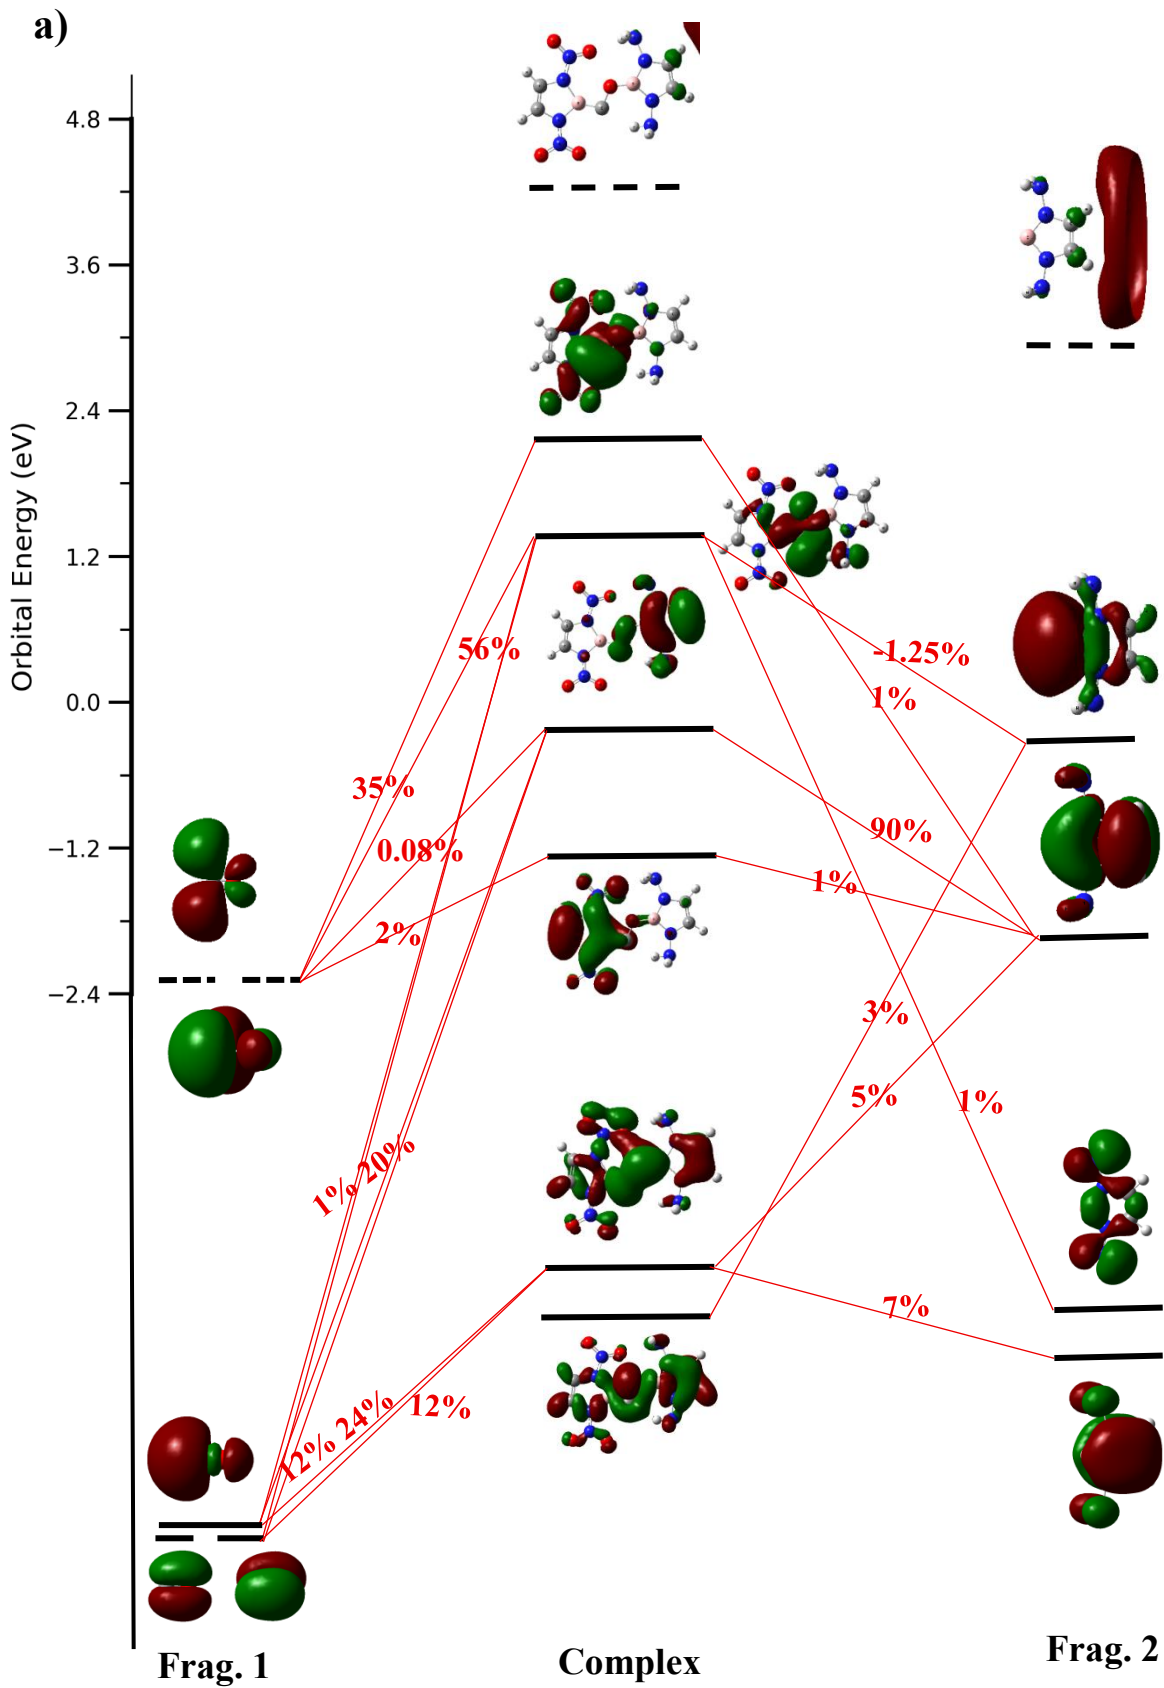

b)

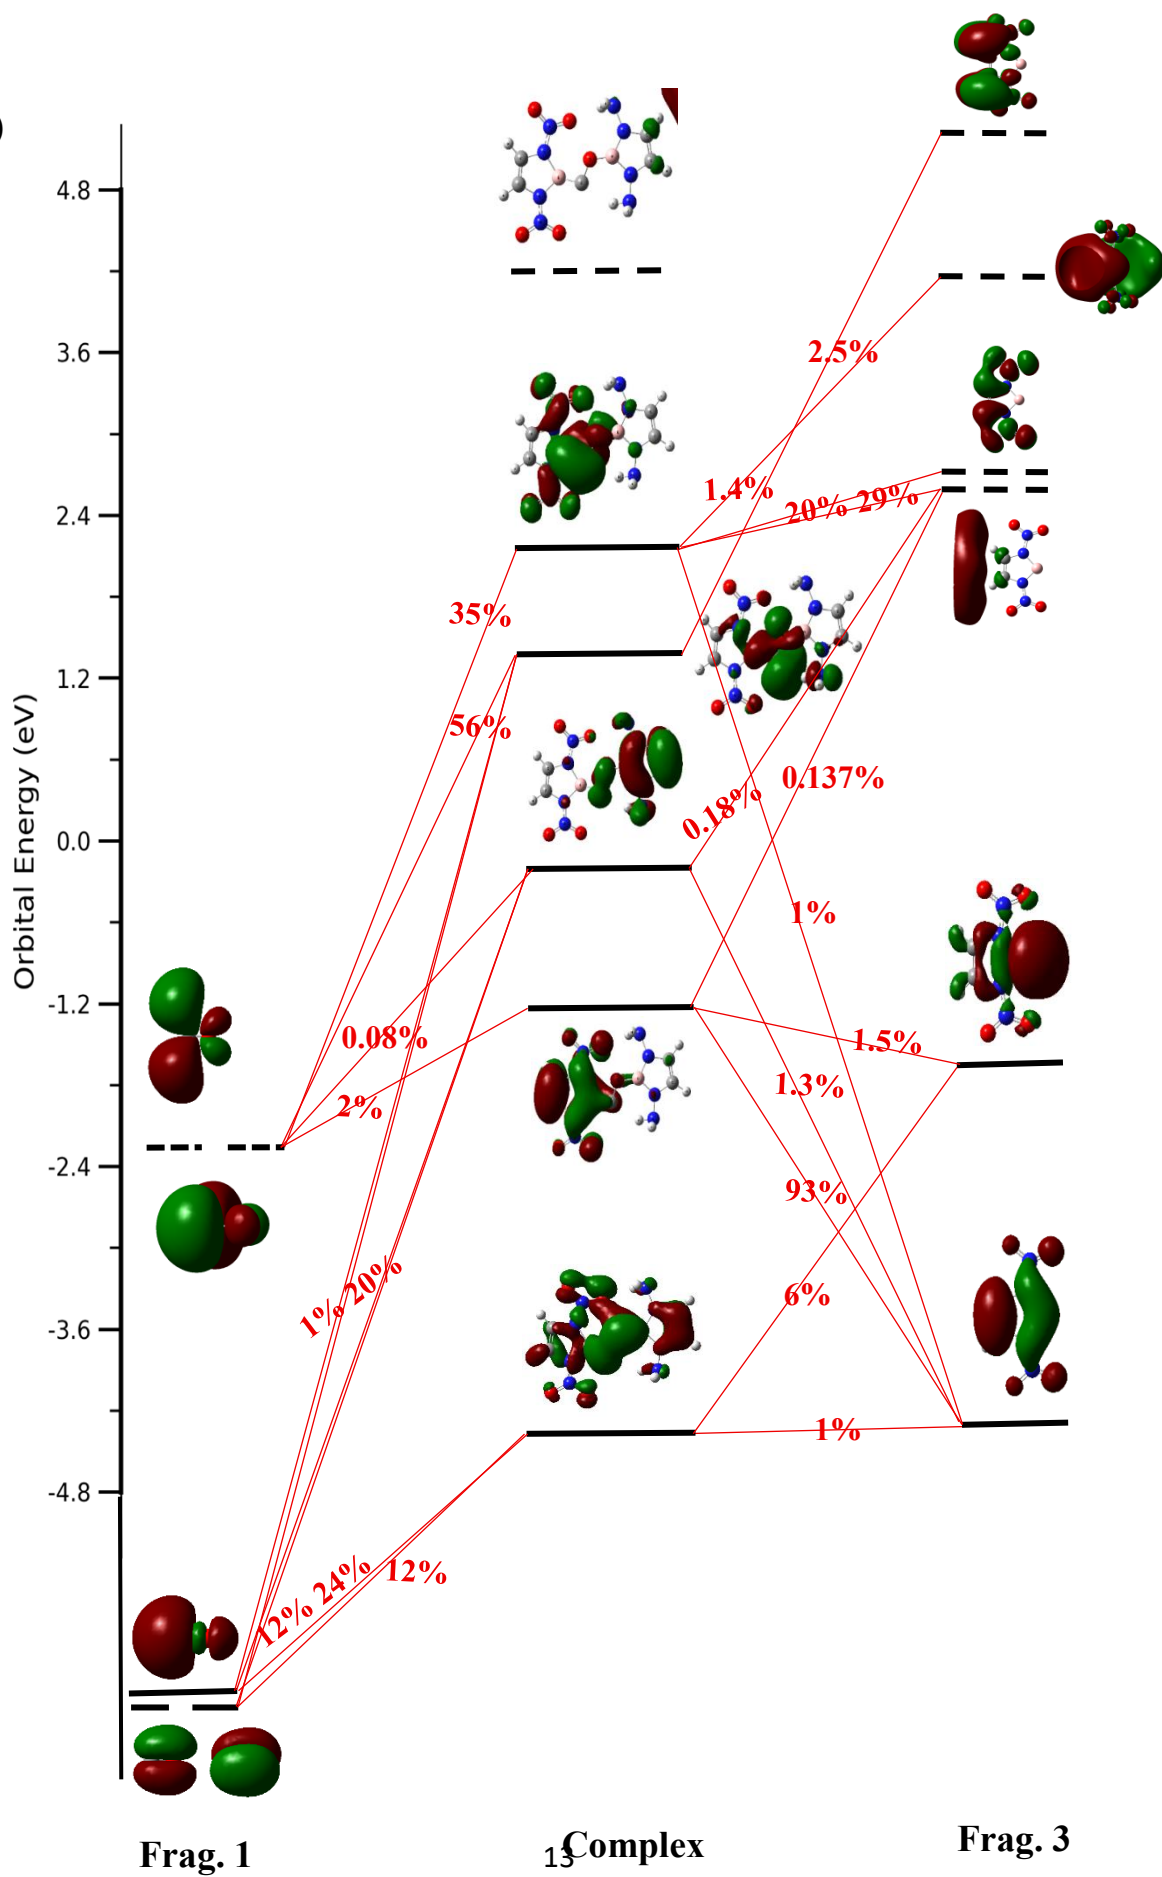

Figure S4: CDA orbital interaction diagrams for the complex  $1\text{NO}_2 - \text{CO} - 1\text{NH}_2$ . The diagrams represent pairwise fragment interactions: (a) CO (Frag. 1) with  $1\text{NH}_2$  (Frag. 2), and (b)  $1\text{NO}_2$  (Frag. 3) with CO (Frag. 1). Red lines indicate orbital mixing between fragments, and the percentage values represent the contribution of each fragment orbital to the corresponding molecular orbitals of the complex.

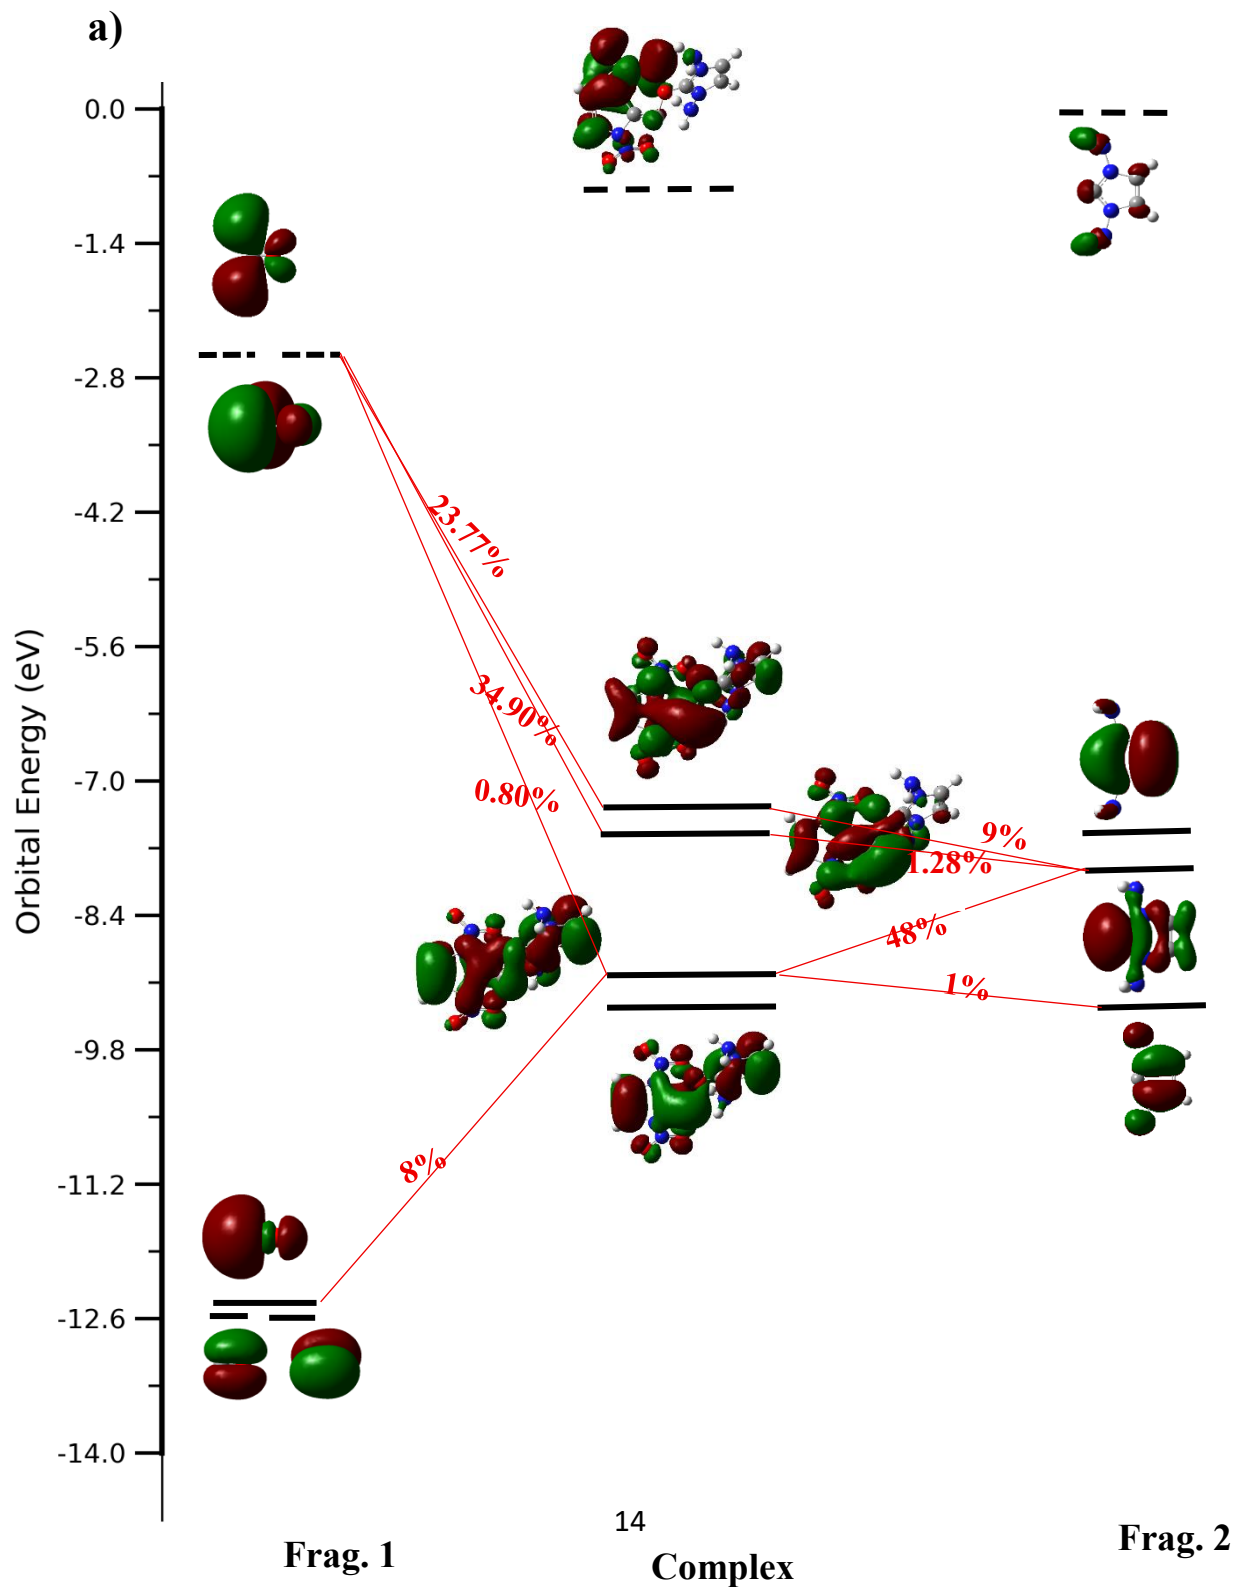

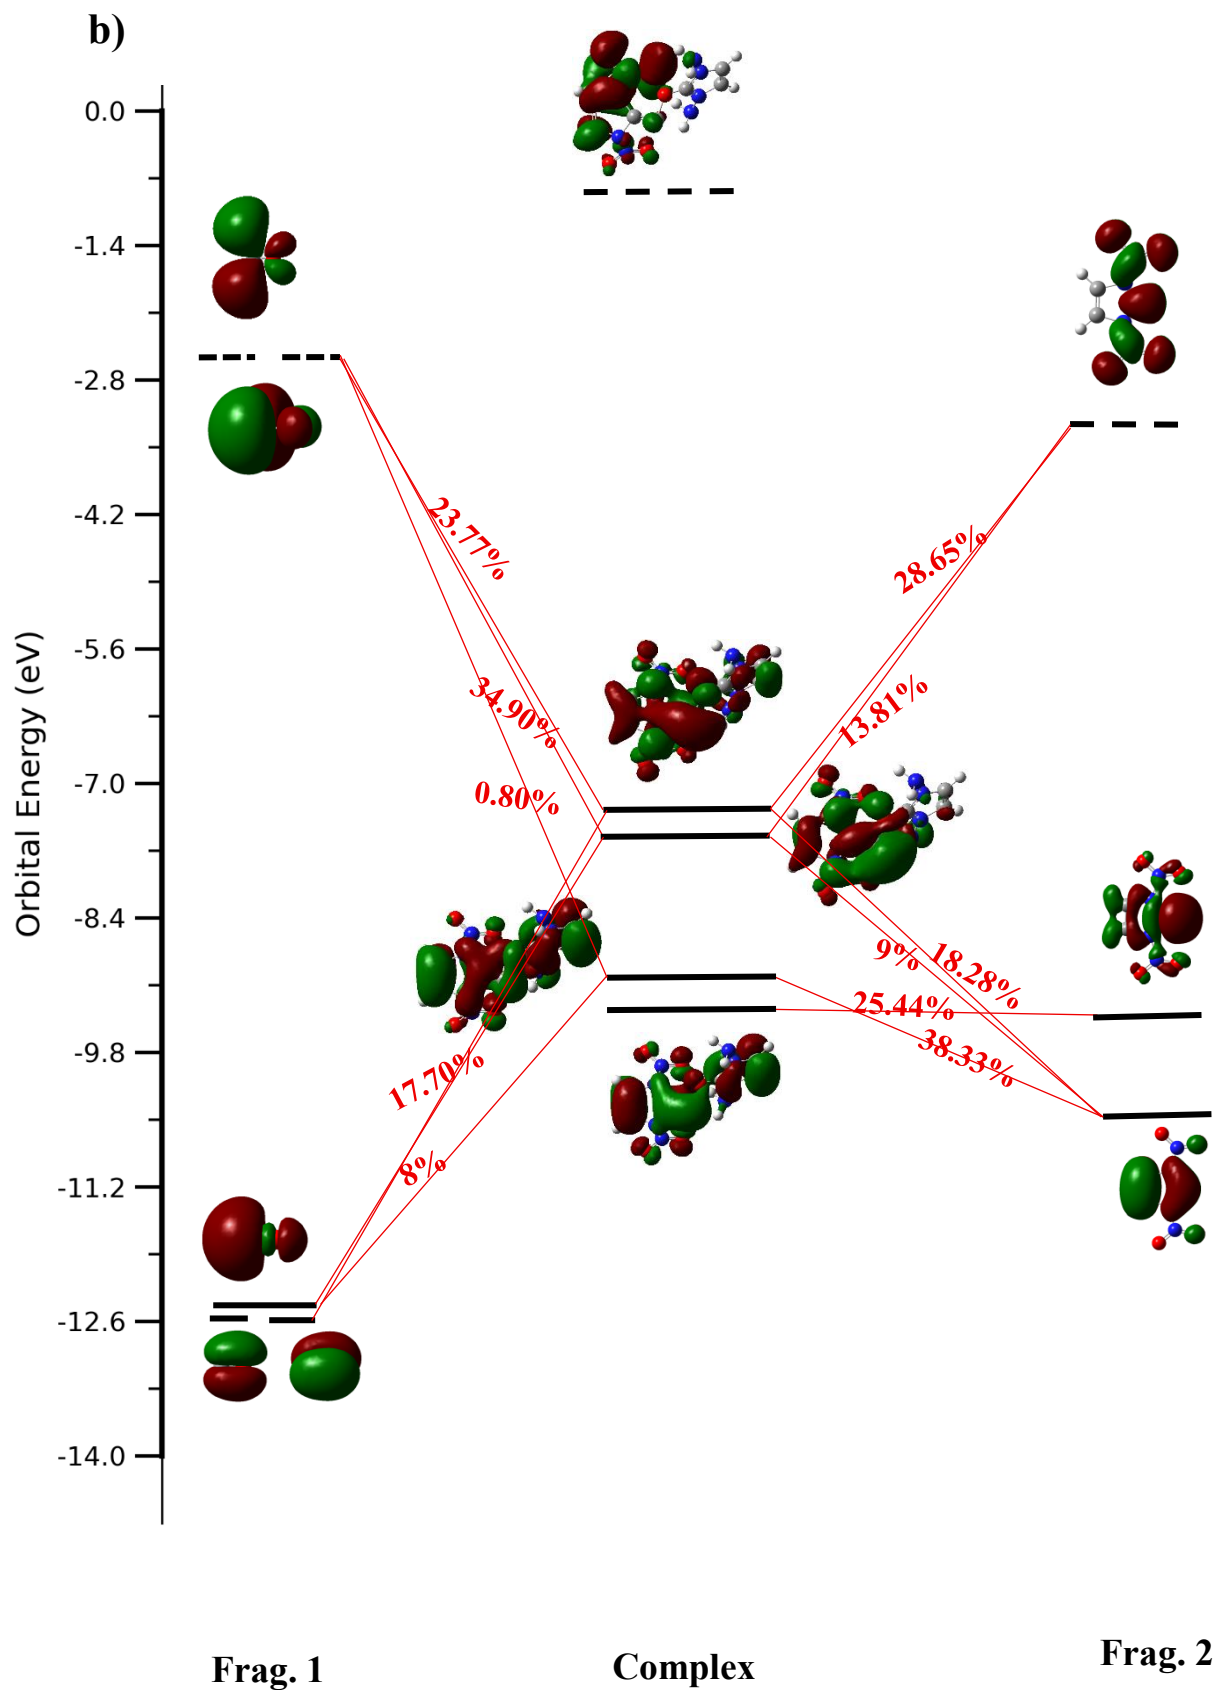

Figure S5: CDA orbital interaction diagrams for the complex  $1\text{NO}_2 - \text{CO} - 2\text{NH}_2$ . The diagrams represent pairwise fragment interactions: (a) CO (Frag. 1) with  $2\text{NH}_2$  (Frag. 2), and (b)  $1\text{NO}_2$  (Frag. 3) with CO (Frag. 1). Red lines indicate orbital mixing between fragments, and the percentage values represent the contribution of each fragment orbital to the corresponding molecular orbitals of the complex.

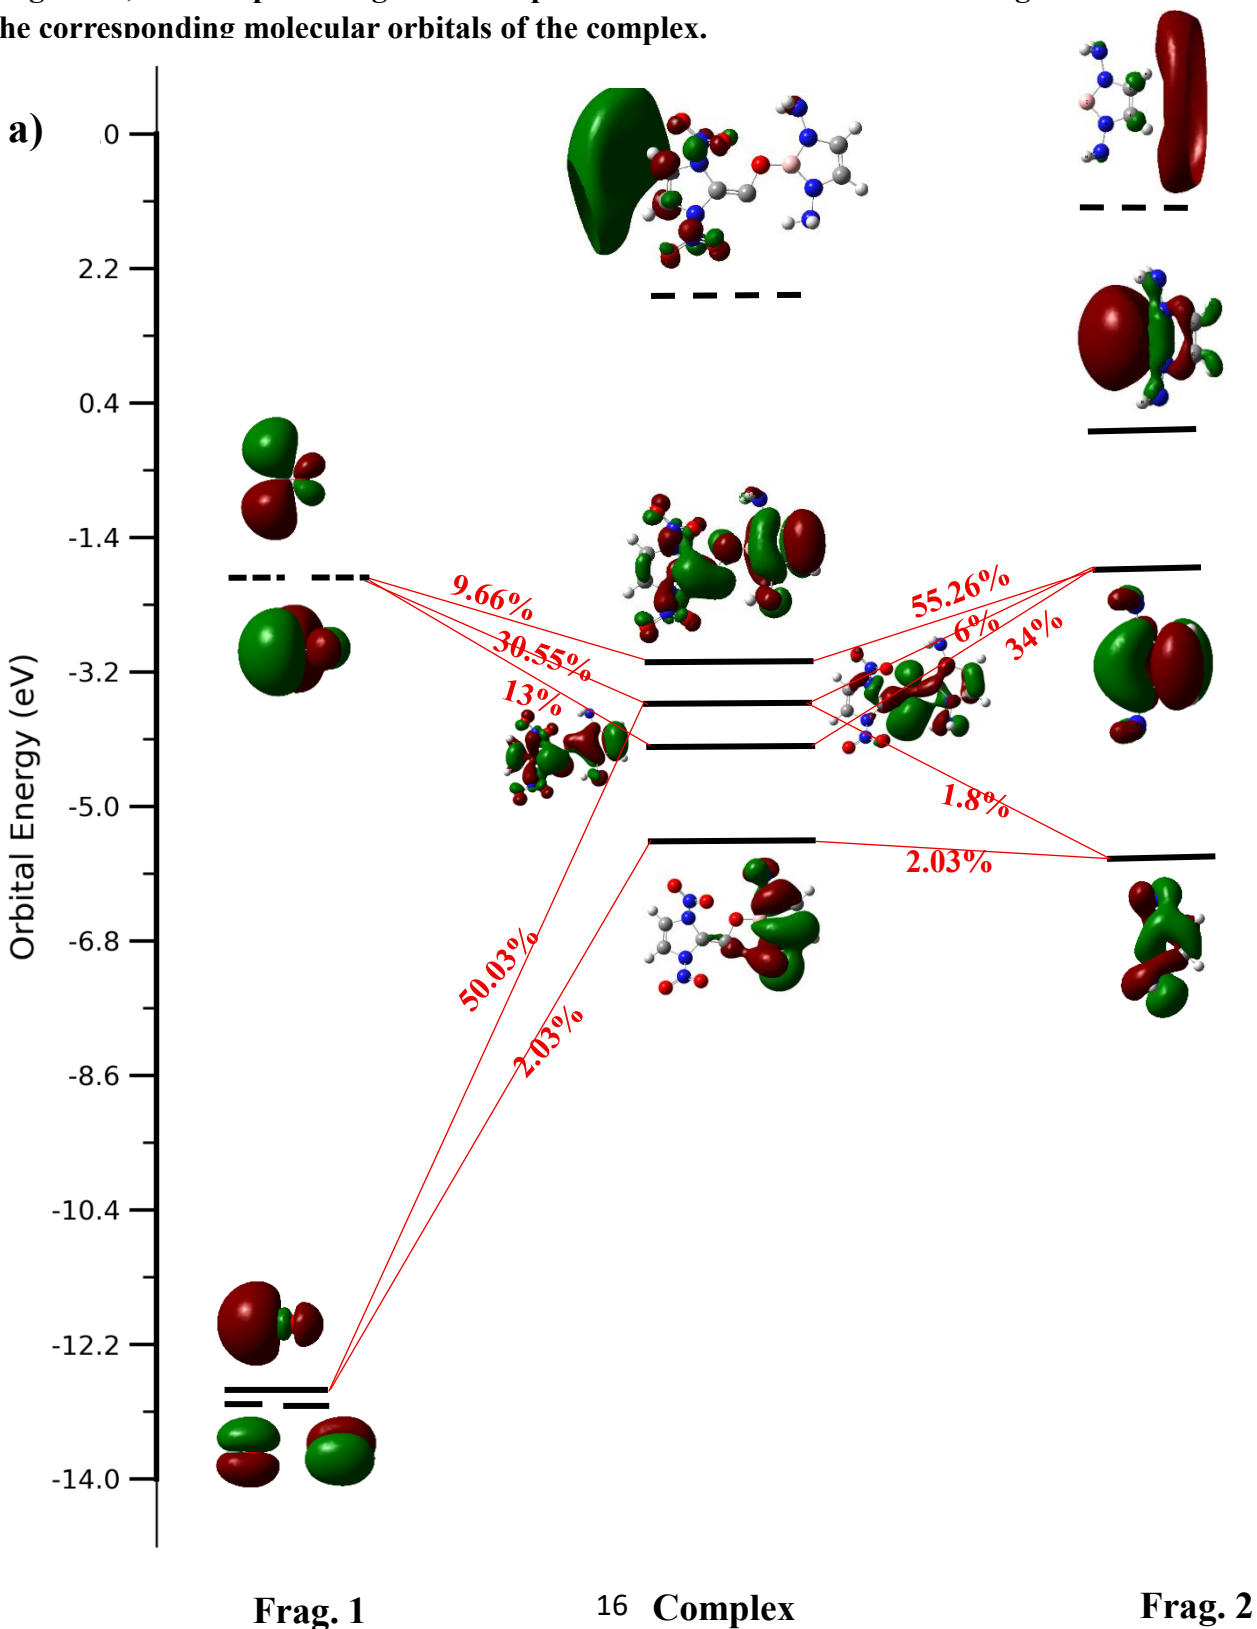

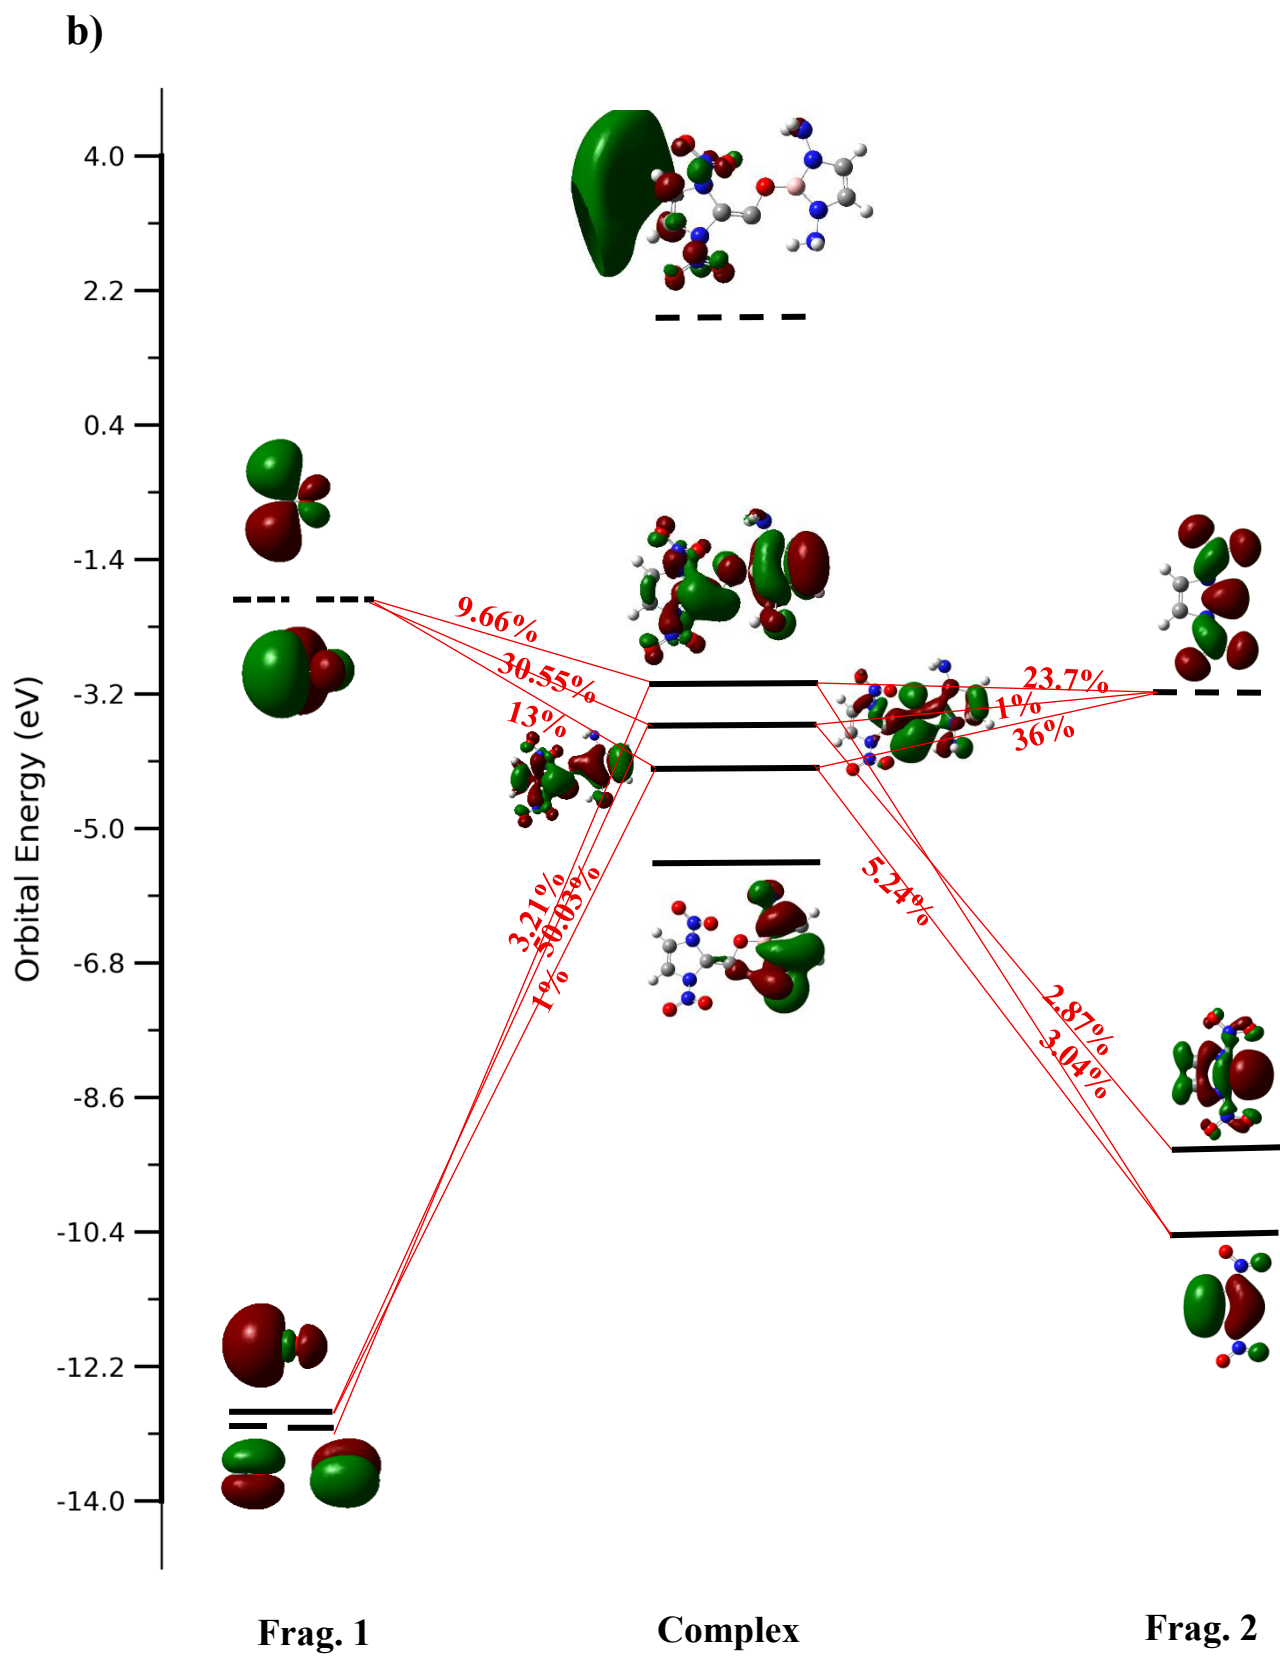

**Figure S6: Charge density difference (CDD) plot of the complex  $2\text{NO}_2 - \text{CO} - 2\text{NH}_2$ . Yellow regions indicate electron accumulation, while blue regions represent electron depletion upon complex formation.**

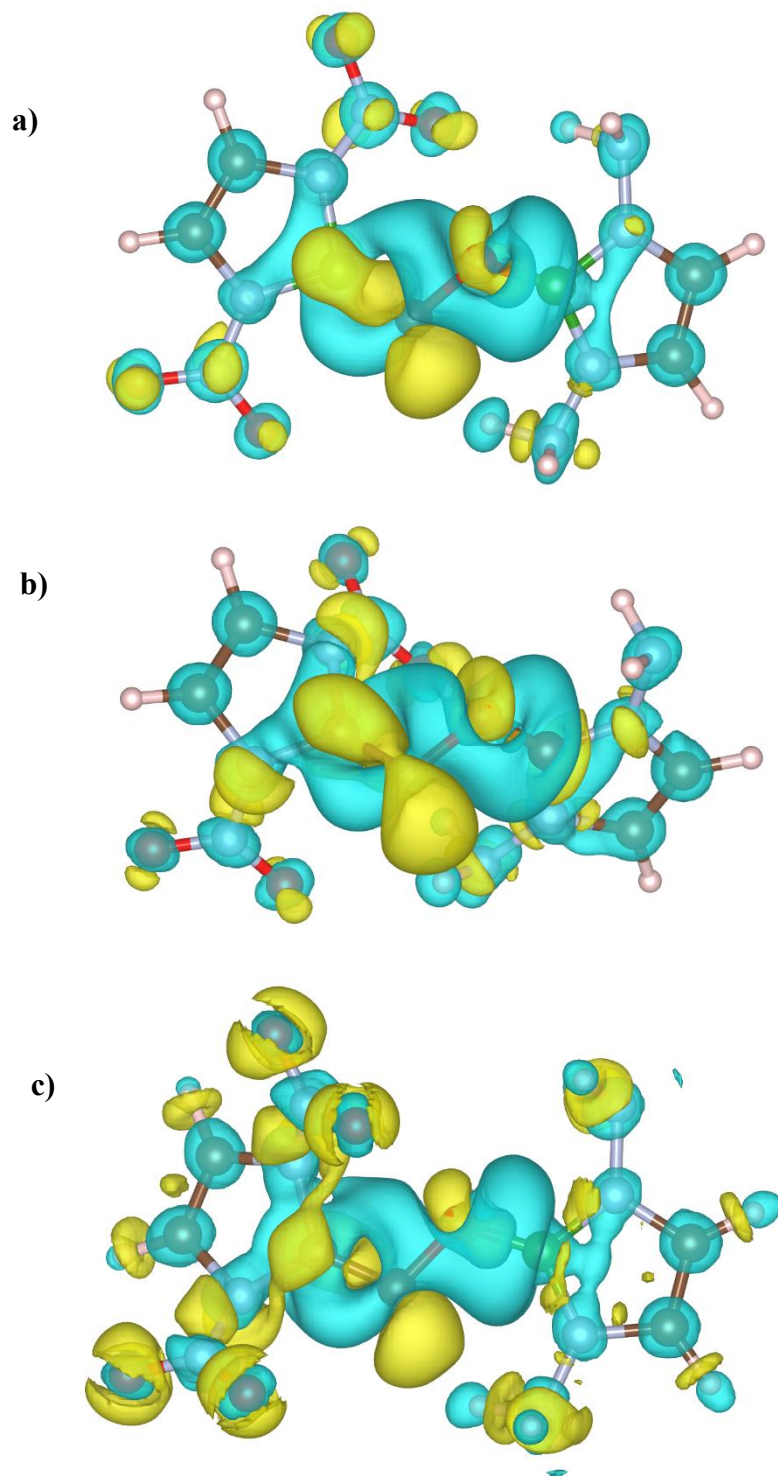

Figure S7: Transition state structures for the possible reaction pathways of  $1\text{NO}_2 - \text{CO} - 2\text{NH}_2$ : (a) concerted mechanism, (b) first transition state corresponding to initial coordination at the oxygen end of CO with  $2\text{NH}_2$ , (c) first transition state corresponding to initial coordination at the carbon end of CO with  $1\text{NO}_2$ , and (d) second transition state involving coordination of  $2\text{NH}_2$  through B-O bond formation with the intermediate.

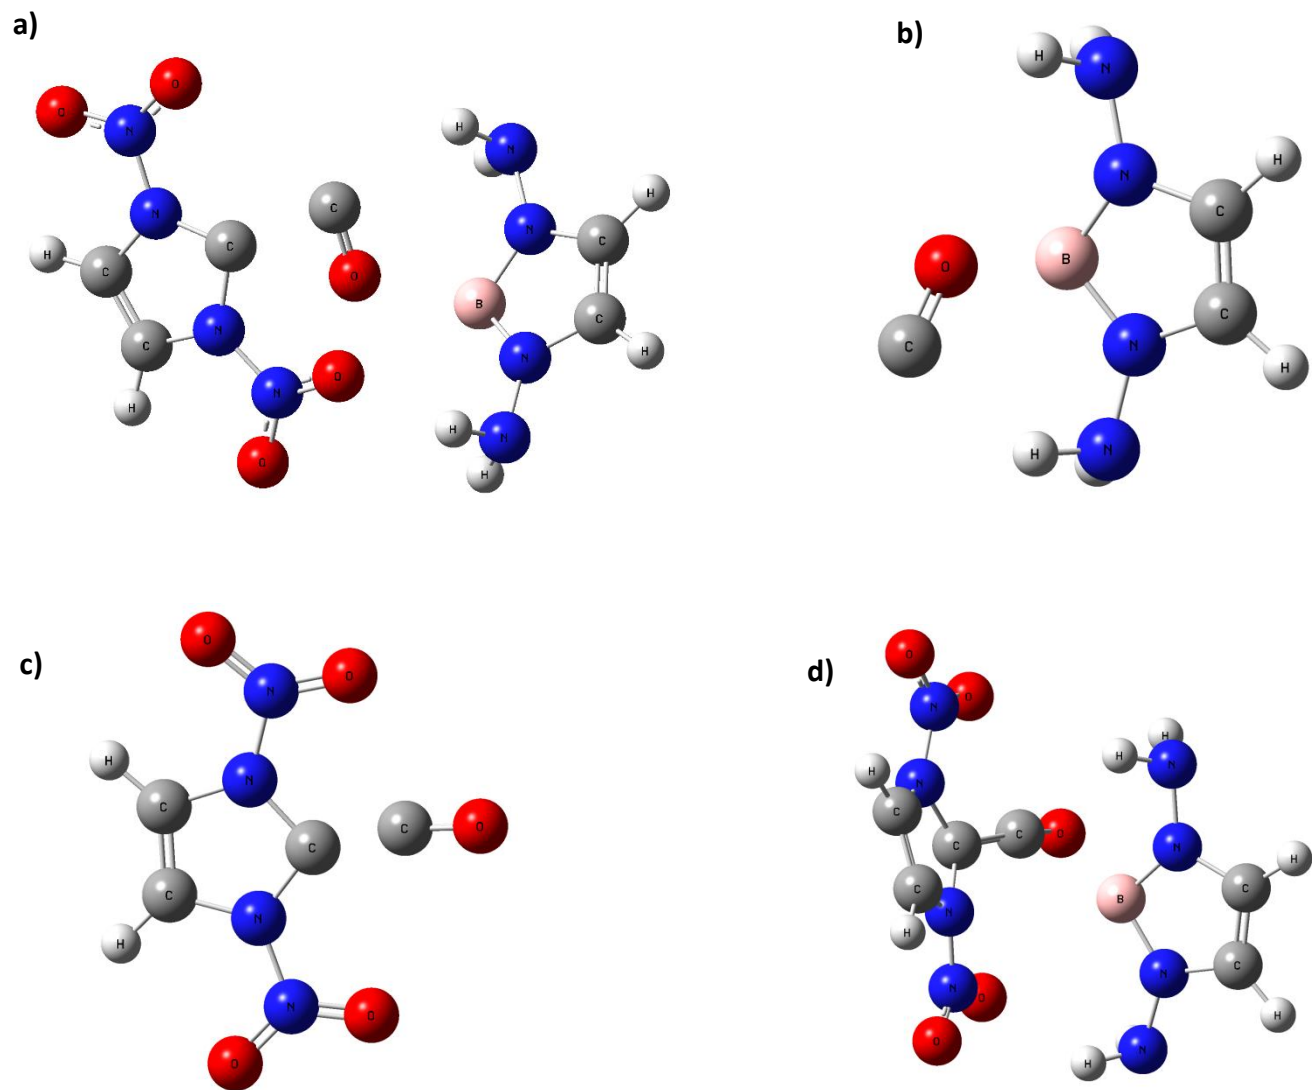

## Cartesian coordinates of computed complexes

### 1. 1H-CO-1H

Charge = 0 Multiplicity = 1

C 3.570199 -0.921314 0.021932  
C 3.915979 0.388173 0.024640  
H 4.190574 -1.805937 0.026813  
H 4.885664 0.864656 0.032652  
C -1.672789 -0.306133 -0.099195  
C -3.584944 0.927716 0.101886  
C -3.940913 -0.366489 0.134885  
H -4.207374 1.812686 0.141929  
H -4.927292 -0.804738 0.220040  
N 2.728240 1.122966 0.015817  
H 2.629363 2.126161 0.007057  
N 2.184067 -0.980228 0.009176  
H 1.446040 -1.708307 0.006662  
N -2.204215 1.004277 -0.185478  
H -1.644943 1.743683 0.215250  
N -2.805974 -1.152616 -0.128661  
H -2.701894 -2.066052 0.289413  
C 1.683631 0.261059 0.004758  
C -0.396200 -0.746528 0.000699  
O 0.445657 0.557269 -0.006678

### 2. 1CH<sub>3</sub> – CO – 1CH<sub>3</sub>

Charge = 0 Multiplicity = 1

C -3.695373 1.013953 0.155293

C -3.955608 -0.257891 -0.225434  
H -4.363694 1.841472 0.348420  
H -4.890154 -0.761465 -0.429589  
C 1.724426 0.088591 -0.192919  
C 3.561602 -1.210126 0.201353  
C 4.001295 0.011454 -0.149125  
H 4.124358 -2.107082 0.428156  
H 5.015583 0.372347 -0.270735  
N -2.732813 -0.898513 -0.342999  
N -2.318257 1.154858 0.284855  
N 2.151222 -1.242134 0.099009  
N 2.909706 0.796487 -0.492512  
C -1.740360 -0.031166 -0.020493  
C 0.517042 0.720663 -0.213613  
O -0.522190 -0.395663 -0.031020  
C 1.429561 -2.027042 1.085478  
H 0.506446 -2.437529 0.667212  
H 2.072029 -2.857401 1.398269  
H 1.177369 -1.414904 1.967945  
C 2.910185 2.233085 -0.545766  
H 3.915823 2.577029 -0.811165  
H 2.189675 2.565497 -1.302252  
H 2.606405 2.670083 0.421096  
C -2.483808 -2.276663 -0.723857  
H -1.553180 -2.314125 -1.297215  
H -2.389311 -2.914436 0.162791

H -3.316983 -2.622147 -1.341413  
C -1.673867 2.381699 0.764970  
H -0.926883 2.128501 1.516962  
H -1.161002 2.882063 -0.056682  
H -2.468538 3.003175 1.192564

**3. 1NH<sub>2</sub>–CO–1NH<sub>2</sub>**

Charge = 0 Multiplicity = 1

C 3.448512 0.834146 -0.703749  
C 3.550044 -0.519825 -0.672307  
H 4.083165 1.596291 -1.133097  
H 4.288654 -1.201424 -1.068976  
C -1.629309 0.205125 0.349028  
C -3.268881 -1.302137 -0.188653  
C -3.777308 -0.073165 -0.368297  
H -3.752555 -2.268610 -0.266432  
H -4.765350 0.239582 -0.684159  
N 2.437447 -0.984129 0.009974  
N 2.286700 1.176492 -0.030783  
N -1.939063 -1.201244 0.334729  
N -2.853710 0.867170 0.055243  
C 1.668008 0.057188 0.385809  
C -0.498989 0.912847 0.571251  
O 0.554707 -0.085963 1.009804  
N 2.066011 -2.322336 0.164798  
H 2.250040 -2.581363 1.133608  
H 1.042493 -2.329939 0.040663  
N -0.980585 -2.002764 -0.373966

H -1.248336 -2.968486 -0.188525  
H -1.130136 -1.852959 -1.378105  
N 1.801116 2.482960 0.137514  
H 0.759314 2.322871 0.217711  
H 2.106098 2.786534 1.063479  
N -2.865802 2.163162 -0.467289  
H -2.579781 2.781168 0.290991  
H -2.108525 2.223803 -1.155621

**4. 1COOH–CO–1COOH**

Charge = 0 Multiplicity = 1

C -3.299173 1.675225 -0.210093  
C -2.301473 2.473616 0.177638  
H -4.357049 1.878636 -0.292175  
H -2.327051 3.505295 0.498274  
N -2.770012 0.399172 -0.517403  
N -1.080835 1.749644 0.135432  
O -3.072622 -1.898895 -0.506158  
O 0.916965 1.290048 1.200465  
C -3.489014 -0.750282 -0.506772  
C -0.027862 2.014744 0.962252  
C 3.349869 -1.306711 0.752750  
C 2.288260 -2.011978 1.172246  
H 4.390635 -1.307918 1.041421  
H 2.197373 -2.776140 1.931579  
N 2.893828 -0.445611 -0.258238  
N 1.178701 -1.619429 0.415740  
C 3.740226 0.520291 -0.832945

C -0.197789 -2.038885 0.755803  
 C -0.605986 -0.338412 -1.309643  
 O 0.824593 0.057600 -1.211224  
 O -0.146161 3.249185 1.509916  
 H 0.627858 3.356168 2.078094  
 O -4.816579 -0.492167 -0.500975  
 H -5.251034 -1.355234 -0.487405  
 O -0.679004 -1.655853 1.779399  
 O 4.897756 0.603571 -0.523954  
 O 3.108928 1.273666 -1.725889  
 H 3.761873 1.898708 -2.073704  
 O -0.655461 -2.901444 -0.114921  
 H -1.616052 -2.679040 -0.261662  
 C 1.540553 -0.628890 -0.422902  
 C -1.331888 0.505850 -0.557737

**5. 1CHO – CO – 1CHO**

Charge = 0 Multiplicity = 1

C 4.030452 -0.425343 -0.414148  
 C 3.460621 -1.624178 -0.558580  
 H 5.051621 -0.099994 -0.561631  
 H 3.893784 -2.569377 -0.859083  
 N 3.059505 0.483155 0.020987  
 N 2.085910 -1.533114 -0.203241  
 O 4.447972 2.261387 0.292559  
 O 0.293565 -2.706939 0.676028  
 C 3.338757 1.778195 0.385322  
 H 2.452792 2.311329 0.764669

H 1.946506 -3.567302 -0.129029  
 C 1.383746 -2.654472 0.141955  
 C -3.922811 0.171330 -0.069201  
 C -3.527169 1.453076 -0.065765  
 H -4.900829 -0.290024 -0.072374  
 H -4.079284 2.382343 -0.070143  
 N -2.765811 -0.618543 -0.055680  
 N -2.116706 1.479097 -0.054193  
 O -3.764741 -2.656784 0.005254  
 O -2.031211 3.751405 -0.090345  
 C -2.737814 -2.042161 0.038105  
 H -1.717882 -2.445499 0.151665  
 H -0.307408 2.580417 -0.054836  
 C -1.395604 2.739373 -0.070067  
 C 0.643950 0.596949 0.058101  
 O -0.501598 -0.302351 -0.076346  
 C -1.668449 0.191541 -0.055568  
 C 1.772406 -0.142611 0.012921

**6. 1NO<sub>2</sub> – CO – 1NO<sub>2</sub>**

Charge = 0 Multiplicity = 1

C -3.200726 1.899845 -0.233029  
 C -3.946781 0.806431 -0.007045  
 H -3.469305 2.916167 -0.488692  
 H -5.013276 0.634890 -0.014781  
 C 1.530971 -0.310751 0.586576  
 C 2.968793 -2.091423 0.296949  
 C 3.681865 -1.096042 0.828245

|   |           |           |           |
|---|-----------|-----------|-----------|
| H | 3.245092  | -3.117373 | 0.096680  |
| H | 4.705549  | -1.086827 | 1.176077  |
| N | -3.050459 | -0.233140 | 0.281524  |
| N | -1.858984 | 1.531412  | -0.074490 |
| N | 1.641499  | -1.636749 | 0.031881  |
| N | 2.867911  | 0.060033  | 0.960365  |
| C | -1.747563 | 0.213674  | 0.244778  |
| C | 0.457692  | 0.405200  | 0.962553  |
| O | -0.730318 | -0.435799 | 0.575270  |
| N | 1.171581  | -1.903337 | -1.271486 |
| O | 1.588326  | -2.922486 | -1.778982 |
| O | 0.354311  | -1.143683 | -1.737097 |
| N | 3.433066  | 1.269943  | 0.497689  |
| O | 2.676311  | 2.154009  | 0.192475  |
| O | 4.646855  | 1.316380  | 0.523905  |
| N | -3.469851 | -1.549523 | 0.622618  |
| O | -4.665066 | -1.687594 | 0.655434  |
| O | -2.600132 | -2.343376 | 0.824649  |
| N | -0.797784 | 2.376665  | -0.644700 |
| O | -0.893751 | 3.522994  | -0.318627 |
| O | -0.063090 | 1.825104  | -1.395434 |

**7.  $\text{1NO}_2 - \text{CO} - \text{1CH}_3$**

Charge = 0 Multiplicity = 1

|   |           |           |          |
|---|-----------|-----------|----------|
| C | -3.653942 | -1.398537 | 0.717881 |
| C | -4.329169 | -0.414291 | 0.076930 |
| H | -4.007941 | -2.206702 | 1.342507 |
| H | -5.385603 | -0.189712 | 0.031268 |

|   |           |           |           |
|---|-----------|-----------|-----------|
| C | 2.684035  | 1.761518  | -0.372697 |
| C | 3.347498  | 0.682451  | -0.795947 |
| H | 3.030418  | 2.775912  | -0.227261 |
| H | 4.385894  | 0.580687  | -1.081040 |
| N | -3.387022 | 0.346960  | -0.594607 |
| N | -2.302501 | -1.231567 | 0.453157  |
| N | 1.314807  | 1.420467  | -0.150534 |
| N | 2.460705  | -0.429557 | -0.885134 |
| C | 0.026501  | -0.552975 | -1.087165 |
| O | -1.095883 | 0.381909  | -0.823876 |
| N | 2.897124  | -1.578000 | -0.182479 |
| O | 2.053926  | -2.314512 | 0.266239  |
| O | 4.099545  | -1.751795 | -0.161052 |
| N | 0.818588  | 1.762146  | 1.115991  |
| O | -0.041135 | 1.052393  | 1.595950  |
| O | 1.244953  | 2.793896  | 1.594316  |
| C | -3.612912 | 1.532898  | -1.405463 |
| H | -4.655187 | 1.530935  | -1.732732 |
| H | -3.403635 | 2.437095  | -0.824062 |
| H | -2.949169 | 1.497332  | -2.273150 |
| C | -1.229299 | -2.039485 | 1.049924  |
| H | -0.447563 | -1.371261 | 1.414911  |
| H | -1.678148 | -2.590221 | 1.881332  |
| H | -0.803541 | -2.713525 | 0.305640  |
| C | -2.163679 | -0.160911 | -0.348528 |
| C | 1.132852  | 0.076198  | -0.652399 |

**8.  $\text{1NO}_2 - \text{CO} - \text{1NH}_2$**

Charge = 0 Multiplicity = 1

C -3.477101 -1.398885 0.858215  
C -4.235132 -0.472851 0.225114  
H -3.723570 -2.189582 1.552301  
H -5.295596 -0.266514 0.233000  
C 2.647332 1.784014 -0.327590  
C 3.341207 0.711373 -0.716135  
H 2.976341 2.800562 -0.158031  
H 4.395386 0.617033 -0.939830  
N -3.367472 0.278847 -0.554281  
N -2.158661 -1.200486 0.469559  
N 1.268345 1.431813 -0.186911  
N 2.467648 -0.406337 -0.863470  
C 0.053562 -0.548263 -1.203439  
O -1.102263 0.367835 -0.995232  
N -3.754188 1.328299 -1.383214  
N -1.101730 -1.941608 1.020266  
N 2.861287 -1.549333 -0.123379  
O 1.991312 -2.278105 0.289330  
O 4.057577 -1.725123 -0.032735  
N 0.701885 1.753686 1.053910  
O -0.179374 1.030475 1.479054  
O 1.091340 2.779631 1.568918  
H -3.275248 2.172613 -1.073674  
H -3.434889 1.120487 -2.328271  
H -0.545611 -1.289082 1.574871  
H -0.497605 -2.220809 0.242299

C -2.104869 -0.168702 -0.393663  
C 1.127043 0.092218 -0.709954

**9. 1CHO – CO – 1CH<sub>3</sub>**

Charge = 0 Multiplicity = 1

C -3.428252 -1.249930 0.767780  
C -4.014026 -0.301300 0.001715  
H -3.852903 -1.945979 1.477348  
H -5.048706 -0.004062 -0.094828  
C 1.417020 0.055105 -0.262111  
C 2.713222 1.848643 0.429674  
C 3.552979 0.858814 0.105417  
H 2.924935 2.862950 0.743429  
H 4.634044 0.833523 0.065695  
N -3.006947 0.290947 -0.742021  
N -2.063688 -1.238042 0.499270  
N 1.376177 1.364005 0.349135  
N 2.813555 -0.283955 -0.218224  
C -1.826908 -0.274644 -0.412955  
C 0.484738 -0.696932 -0.876834  
O -0.740131 0.137935 -0.952719  
C 0.397353 1.842129 1.168255  
O -0.656714 1.292216 1.444367  
H 0.664857 2.833868 1.579754  
C 3.367630 -1.486019 -0.567325  
O 4.568027 -1.679140 -0.601008  
H 2.604399 -2.242923 -0.810923  
C -3.110665 1.417630 -1.651806

H -2.677444 2.310904 -1.188393  
H -2.568671 1.189124 -2.573705  
H -4.167660 1.584278 -1.871314  
C -1.079048 -1.990070 1.282151  
H -0.424417 -2.550310 0.615156  
H -0.491191 -1.287571 1.878847  
H -1.644634 -2.663128 1.932907

**10. 1CHO – CO – 1NH<sub>2</sub>**

Charge = 0 Multiplicity = 1

C 3.733857 -1.420442 0.319591  
C 4.088158 -0.111859 0.334859  
H 4.280697 -2.323179 0.551526  
H 5.012552 0.390154 0.581443  
C -3.102790 1.607107 -0.435799  
C -3.714292 0.432131 -0.255427  
H -3.518850 2.578344 -0.670961  
H -4.761201 0.163629 -0.309252  
N 2.966357 0.610008 -0.035253  
N 2.406829 -1.483812 -0.076742  
N -1.704639 1.440013 -0.212272  
N -2.756946 -0.537991 0.062269  
C -0.340272 -0.718903 -0.256194  
O 0.769781 0.177105 -0.621655  
N 2.898765 2.003345 -0.067369  
N 1.691265 -2.684856 -0.220575  
O -4.191904 -2.264097 0.422402  
O 0.145506 2.372276 0.809403

H 2.816421 2.287958 -1.042210  
H 2.023896 2.272884 0.396903  
H 1.795296 -2.967126 -1.196406  
H 0.696163 -2.371676 -0.122213  
C -0.945511 2.461771 0.271441  
C -3.056569 -1.831546 0.397295  
H -1.442956 3.437813 0.120018  
H -2.158644 -2.422779 0.638376  
C -1.446297 0.025729 -0.098103  
C 1.943409 -0.236529 -0.274135

**11. 1COOH – CO – 1CH<sub>3</sub>**

Charge = 0 Multiplicity = 1

C -3.524374 -1.407110 -0.910482  
C -4.191727 -0.626393 -0.029328  
H -3.887426 -2.038321 -1.709255  
H -5.248924 -0.441546 0.099152  
C 1.212158 0.026962 0.376705  
C 2.404357 2.010057 0.194244  
C 3.293195 1.024716 0.353877  
H 2.549318 3.079827 0.152626  
H 4.366991 1.058712 0.479771  
N -3.239553 -0.052265 0.796816  
N -2.166593 -1.308084 -0.632647  
N 1.110879 1.430394 0.039998  
N 2.630397 -0.214151 0.319509  
C -2.012778 -0.459220 0.403409  
C 0.295765 -0.834278 0.859266

O -0.959717 -0.029908 0.992683  
 C -3.451339 0.912057 1.861042  
 H -2.715586 0.729840 2.648368  
 H -3.329229 1.932436 1.480538  
 H -4.461104 0.777647 2.256607  
 C -1.119164 -1.875507 -1.489847  
 H -0.610911 -1.058826 -2.008825  
 H -0.403327 -2.428394 -0.881130  
 H -1.623328 -2.531010 -2.206021  
 C 0.165708 1.945153 -0.793708  
 O -0.774025 1.354605 -1.296922  
 O 0.377558 3.270039 -1.008479  
 H -0.323256 3.547838 -1.611761  
 C 3.328615 -1.380844 0.200457  
 O 4.542900 -1.446711 0.246615  
 O 2.537448 -2.451984 0.007831  
 H 3.145062 -3.201348 -0.053422

**12. 1COOH – CO – 1NH<sub>2</sub>**

Charge = 0 Multiplicity = 1

C -3.873000 -1.570164 0.320277  
 C -4.268665 -0.273518 0.338841  
 H -4.385028 -2.487664 0.572779  
 H -5.200734 0.200494 0.610743  
 C 2.790698 1.655788 -0.546371  
 C 3.459368 0.507671 -0.415960  
 H 3.144840 2.646853 -0.788161  
 H 4.513514 0.290813 -0.524101

N -3.181201 0.478990 -0.071015  
 N -2.557503 -1.597243 -0.116902  
 N 1.412074 1.409875 -0.268314  
 N 2.566726 -0.520415 -0.072746  
 C 0.136756 -0.783978 -0.393493  
 O -0.991855 0.113993 -0.721111  
 N -3.144771 1.873397 -0.096528  
 N -1.804122 -2.777946 -0.254848  
 H -2.279549 2.153294 0.378879  
 H -3.063433 2.164454 -1.069401  
 H -0.813344 -2.413968 -0.203131  
 H -1.928470 -3.082345 -1.221793  
 C 0.624667 2.331810 0.350385  
 O -0.412004 2.131915 0.959367  
 O 1.134660 3.580621 0.199034  
 H 0.538843 4.166447 0.683193  
 C 3.032365 -1.760943 0.266285  
 O 4.211682 -2.058369 0.251959  
 O 2.058476 -2.613904 0.626194  
 H 2.517625 -3.430049 0.868065  
 C 1.222412 -0.020774 -0.195046  
 C -2.139662 -0.337388 -0.336275

**13. 2H – CO – 2H**

Charge = -2 Multiplicity = 1

C -3.901021 -0.788560 0.017339  
 C -4.071307 0.556857 -0.003993  
 H -4.658628 -1.563689 0.028826

|   |           |           |           |
|---|-----------|-----------|-----------|
| H | -4.994550 | 1.124022  | -0.009956 |
| C | 3.838544  | 0.919705  | 0.016692  |
| C | 4.164098  | -0.404284 | -0.014796 |
| H | 4.503269  | 1.776122  | 0.035336  |
| H | 5.149189  | -0.857014 | -0.033530 |
| N | -2.814573 | 1.174095  | -0.022340 |
| H | -2.715968 | 2.177176  | -0.042339 |
| N | -2.534512 | -1.073155 | 0.015371  |
| H | -2.139078 | -2.000632 | 0.014188  |
| N | 2.458663  | 1.038562  | 0.027575  |
| H | 1.998848  | 1.936577  | 0.049617  |
| N | 2.996111  | -1.146936 | -0.017302 |
| H | 3.002160  | -2.155269 | -0.046226 |
| C | 0.356550  | -0.732116 | 0.028633  |
| O | -0.426550 | 0.360935  | -0.024676 |
| B | 1.856691  | -0.269328 | -0.012645 |
| B | -1.815460 | 0.152858  | -0.004333 |

**14. 2CH<sub>3</sub> – CO – 2CH<sub>3</sub>**

Charge = -2 Multiplicity = 1

|   |           |           |           |
|---|-----------|-----------|-----------|
| C | 3.942222  | 0.921203  | -0.021008 |
| C | 4.098928  | -0.426193 | -0.001858 |
| H | 4.705783  | 1.691557  | -0.037125 |
| H | 5.015607  | -1.005360 | -0.002555 |
| C | -3.841129 | -1.108533 | -0.053250 |
| C | -4.191407 | 0.211936  | -0.040552 |
| H | -4.489873 | -1.978150 | -0.081808 |
| H | -5.186393 | 0.645081  | -0.051259 |

|   |           |           |           |
|---|-----------|-----------|-----------|
| N | 2.843181  | -1.028045 | 0.024563  |
| N | 2.584423  | 1.244053  | -0.011531 |
| N | -2.465236 | -1.217111 | -0.028370 |
| N | -3.047822 | 0.980302  | -0.012286 |
| C | -0.436735 | 0.686603  | -0.003388 |
| O | 0.485942  | -0.295549 | 0.028690  |
| B | -1.891788 | 0.111297  | 0.020007  |
| B | 1.856083  | 0.010516  | 0.006827  |
| C | 2.664364  | -2.462749 | 0.008598  |
| H | 3.171531  | -2.934506 | 0.860747  |
| H | 1.595161  | -2.687198 | 0.072528  |
| H | 3.059544  | -2.903031 | -0.918901 |
| C | 2.154977  | 2.631242  | -0.033598 |
| H | 1.063162  | 2.648386  | -0.014217 |
| H | 2.553426  | 3.168095  | 0.838391  |
| H | 2.519437  | 3.128938  | -0.945595 |
| C | -1.803683 | -2.504952 | 0.026418  |
| H | -0.725453 | -2.338308 | 0.037071  |
| H | -2.089196 | -3.053022 | 0.937524  |
| H | -2.065158 | -3.119653 | -0.844190 |
| C | -3.084068 | 2.425112  | 0.069029  |
| H | -3.542827 | 2.752725  | 1.014572  |
| H | -2.054872 | 2.794256  | 0.025646  |
| H | -3.661533 | 2.849109  | -0.763494 |

**15. 2NH<sub>2</sub> – CO – 2NH<sub>2</sub>**

Charge = -2 Multiplicity = 1

|   |           |           |           |
|---|-----------|-----------|-----------|
| C | -4.141257 | -0.264406 | -0.119873 |
|---|-----------|-----------|-----------|

|   |           |           |           |
|---|-----------|-----------|-----------|
| C | -3.862628 | 1.060401  | 0.015613  |
| H | -5.092029 | -0.775561 | -0.209979 |
| H | -4.539326 | 1.906004  | 0.058652  |
| C | 4.189896  | 0.136955  | -0.146032 |
| C | 3.802473  | -1.169193 | 0.007191  |
| H | 5.185983  | 0.553460  | -0.246816 |
| H | 4.409339  | -2.066332 | 0.059035  |
| N | -2.489154 | 1.232928  | 0.127599  |
| N | -2.938062 | -0.969771 | -0.104891 |
| N | 3.064268  | 0.924819  | -0.207634 |
| N | 2.424644  | -1.223943 | 0.041906  |
| C | 0.434845  | 0.675871  | -0.079413 |
| O | -0.511893 | -0.391296 | 0.020546  |
| B | 1.849972  | 0.124152  | -0.029389 |
| B | -1.833383 | -0.042133 | 0.017503  |
| N | -1.910161 | 2.522064  | 0.251075  |
| H | -1.851820 | 2.710827  | 1.253364  |
| H | -0.919150 | 2.332501  | -0.006886 |
| N | -2.925546 | -2.361127 | -0.313440 |
| H | -2.323598 | -2.552573 | -1.114878 |
| H | -2.469306 | -2.794633 | 0.486863  |
| N | 3.165769  | 2.328569  | -0.219161 |
| H | 2.327829  | 2.638265  | -0.714347 |
| H | 3.001977  | 2.644289  | 0.745386  |
| N | 1.784871  | -2.423970 | 0.424431  |
| H | 1.673361  | -2.389562 | 1.447395  |
| H | 0.832555  | -2.331155 | 0.073167  |

## 16. 2CHO – CO – 2CHO

Charge = -2 Multiplicity = 1

|   |           |           |          |
|---|-----------|-----------|----------|
| C | -2.148832 | -3.647381 | 0.000000 |
| C | -3.024119 | -2.623312 | 0.000000 |
| H | -2.353617 | -4.712388 | 0.000000 |
| H | -4.107797 | -2.657186 | 0.000000 |
| N | -0.831402 | -3.180130 | 0.000000 |
| N | -2.353525 | -1.386867 | 0.000000 |
| O | 0.162621  | -5.255828 | 0.000000 |
| O | -4.279554 | -0.126932 | 0.000000 |
| C | 0.219502  | -4.015412 | 0.000000 |
| H | 1.175995  | -3.463618 | 0.000000 |
| H | -2.376446 | 0.647689  | 0.000000 |
| C | -3.041159 | -0.231372 | 0.000000 |
| C | 1.986604  | 3.695392  | 0.000000 |
| C | 2.970571  | 2.776327  | 0.000000 |
| H | 2.046771  | 4.776540  | 0.000000 |
| H | 4.044055  | 2.922593  | 0.000000 |
| N | 0.737364  | 3.045491  | 0.000000 |
| N | 2.444836  | 1.473866  | 0.000000 |
| O | -0.570309 | 4.929547  | 0.000000 |
| O | 4.496898  | 0.467850  | 0.000000 |
| C | -0.445349 | 3.708562  | 0.000000 |
| H | -1.308899 | 3.019609  | 0.000000 |
| H | 2.668642  | -0.566560 | 0.000000 |
| C | 3.273317  | 0.362792  | 0.000000 |
| C | 0.384809  | -0.813283 | 0.000000 |

O 0.000000 0.667747 0.000000  
B 0.960256 1.554833 0.000000  
B -0.820039 -1.628063 0.000000

**17. 2NO<sub>2</sub> – CO – 2NO<sub>2</sub>**

Charge = -2 Multiplicity = 1

C 3.201037 0.939080 -1.561850  
C 3.989030 0.171186 -0.791984  
H 3.476961 1.654015 -2.323790  
H 5.065528 0.088303 -0.775955  
C -3.232900 1.179730 1.118473  
C -3.976965 0.336358 0.383352  
H -3.540118 2.065642 1.655685  
H -5.038123 0.367328 0.184357  
N 3.195229 -0.596059 0.075205  
N 1.853847 0.717136 -1.245788  
N -1.898720 0.767210 1.122190  
N -3.183108 -0.678122 -0.154964  
C -0.581219 -1.300372 -0.234061  
O 0.731478 -1.079998 0.222393  
B -1.687192 -0.507957 0.246836  
B 1.716391 -0.347197 -0.183400  
N 3.779014 -1.451891 0.932564  
O 5.019308 -1.528925 0.913734  
O 3.057249 -2.095304 1.673973  
N 0.926009 1.620886 -1.679865  
O -0.133279 1.662801 -1.101557  
O 1.251725 2.333792 -2.639301

N -3.778696 -1.625061 -0.875579  
O -3.087784 -2.514060 -1.355840  
O -5.028081 -1.560446 -1.026362  
N -1.016773 1.479378 1.811333  
O 0.149959 1.092090 1.844967  
O -1.415796 2.503830 2.413402

**18. 2NO<sub>2</sub> – CO – 2CH<sub>3</sub>**

Charge = -2 Multiplicity = 1

C -4.404099 -1.328360 -0.029369  
C -4.707966 -0.001286 -0.096885  
H -5.086549 -2.173175 0.005845  
H -5.687672 0.467608 -0.127181  
C 3.251204 1.338552 -0.301271  
C 3.693329 0.069566 -0.284229  
H 3.810475 2.249597 -0.459195  
H 4.696709 -0.300634 -0.436358  
N -3.527785 0.728586 -0.122404  
N -3.025633 -1.503963 -0.007947  
N 1.875520 1.376051 -0.047430  
N 2.644499 -0.813639 -0.023325  
C -0.042856 -0.689993 0.056980  
O -1.126535 0.253983 -0.098298  
N 2.931596 -2.108301 0.061513  
O 2.022829 -2.895000 0.314752  
O 4.129390 -2.473410 -0.128547  
N 1.325184 2.561765 0.187841  
O 0.167576 2.606784 0.606848

O 2.016534 3.596953 -0.026372  
 C -3.449018 2.164139 -0.154239  
 H -4.005811 2.619095 0.683035  
 H -2.390526 2.440399 -0.065810  
 H -3.848428 2.579322 -1.096315  
 C -2.412373 -2.814710 0.067044  
 H -1.322805 -2.647987 0.102826  
 H -2.746151 -3.349671 0.973593  
 H -2.678059 -3.423167 -0.815300  
 B -2.392432 -0.191356 -0.069816  
 B 1.281924 -0.066005 0.070191

**19. 2NO<sub>2</sub> – CO – 2NH<sub>2</sub>**

Charge = -2 Multiplicity = 1

C -4.228332 -1.473121 0.255601  
 C -4.584710 -0.156859 0.194782  
 H -4.836674 -2.338197 0.498061  
 H -5.547301 0.310696 0.370561  
 C 3.011397 1.553265 -0.290993  
 C 3.623241 0.357676 -0.223446  
 H 3.448609 2.530605 -0.440214  
 H 4.672879 0.124976 -0.332638  
 N -3.465520 0.582815 -0.182350  
 N -2.887239 -1.604716 -0.073598  
 N 1.631904 1.402392 -0.090201  
 N 2.693178 -0.654819 0.024979  
 C -0.014390 -0.818830 -0.158078  
 O -1.060618 0.118832 -0.554898

B 1.249759 -0.100917 0.006300  
 B -2.316588 -0.297729 -0.308331  
 N -3.437020 1.992197 -0.109551  
 N -2.184434 -2.833096 0.033232  
 N 3.127756 -1.904429 0.130679  
 O 2.303154 -2.783851 0.366771  
 O 4.360706 -2.130058 -0.025880  
 N 0.935211 2.490171 0.236568  
 O -0.184908 2.357897 0.732216  
 O 1.460717 3.617137 0.027776  
 H -2.577911 2.227010 0.397172  
 H -3.254632 2.331859 -1.053531  
 H -1.193428 -2.482142 0.161051  
 H -2.149899 -3.217631 -0.913696

**20. 2CHO – CO – 2CH<sub>3</sub>**

Charge = -2 Multiplicity = 1

C 4.159280 -1.310914 -0.015319  
 C 4.436749 0.023538 -0.023988  
 H 4.858019 -2.143070 -0.020379  
 H 5.408861 0.509410 -0.033795  
 C -3.530583 1.410970 -0.005673  
 C -3.989011 0.146274 -0.011512  
 H -4.127593 2.320513 -0.006897  
 H -5.016563 -0.200141 -0.019553  
 N 3.245451 0.733494 -0.017319  
 N 2.781918 -1.510538 -0.001061  
 N -2.125277 1.474038 0.005350

N -2.928767 -0.758243 -0.005658  
 C -0.281887 -0.681270 0.028339  
 O 0.856308 0.216024 0.020921  
 C -1.555432 2.699525 0.000981  
 O -0.364689 3.003877 0.010414  
 H -2.328735 3.507720 -0.015276  
 C -3.141145 -2.082915 -0.006329  
 O -4.255635 -2.639389 -0.009906  
 H -2.191166 -2.644148 -0.004085  
 C 3.137515 2.168676 0.001324  
 H 3.607950 2.625178 -0.886203  
 H 2.069349 2.422956 0.008667  
 H 3.614861 2.601547 0.898912  
 C 2.188760 -2.828479 0.019617  
 H 1.098049 -2.681508 0.031773  
 H 2.481794 -3.409693 -0.872346  
 H 2.504385 -3.390914 0.917680  
 B 2.124067 -0.206852 0.007439  
 B -1.569233 0.005726 -0.000189

**21. 2CHO – CO – 2NH<sub>2</sub>**

Charge = -2 Multiplicity = 1

C 4.132845 -1.344640 0.001927  
 C 4.531293 -0.044310 -0.120989  
 H 4.736778 -2.246090 0.010333  
 H 5.524741 0.376111 -0.229191  
 C -3.425004 1.272689 0.030596  
 C -3.867540 0.001618 -0.038358

H -4.004990 2.188689 0.063407  
 H -4.891053 -0.356104 -0.073783  
 N 3.392926 0.760494 -0.081962  
 N 2.757085 -1.399661 0.129941  
 N -2.021406 1.321006 0.055944  
 N -2.801607 -0.902995 -0.064416  
 C -0.123522 -0.700882 -0.009968  
 O 0.931745 0.384655 0.057214  
 B -1.453351 -0.127911 -0.000565  
 B 2.192332 -0.067185 0.046001  
 N 3.470887 2.151679 -0.280734  
 N 2.034566 -2.620360 0.220537  
 O -4.105002 -2.798909 -0.180417  
 O -1.913070 3.619504 0.170597  
 H 2.879895 2.368511 -1.084498  
 H 2.992134 2.589341 0.506307  
 H 1.040641 -2.244953 0.022331  
 H 1.975045 -2.826457 1.222227  
 C -1.373192 2.496304 0.122541  
 C -3.001284 -2.225820 -0.133430  
 H -0.279209 2.365481 0.132226  
 H -2.047012 -2.781948 -0.144767

**22. 2COOH – CO – 2CH<sub>3</sub>**

Charge = -2 Multiplicity = 1

C 4.348173 -1.442412 -0.041249  
 C 4.702656 -0.130041 -0.144891  
 H 5.000076 -2.311170 0.000220

|   |           |           |           |
|---|-----------|-----------|-----------|
| H | 5.699588  | 0.298703  | -0.203059 |
| N | 3.549911  | 0.643632  | -0.173673 |
| N | 2.966320  | -1.566262 | 0.001669  |
| C | -0.012215 | -0.684254 | 0.001579  |
| O | 1.127706  | 0.250261  | -0.090241 |
| B | 2.370609  | -0.231325 | -0.082272 |
| C | -3.195651 | 1.422860  | -0.446905 |
| C | -3.677845 | 0.169892  | -0.446462 |
| H | -3.722416 | 2.343500  | -0.672043 |
| H | -4.683455 | -0.159435 | -0.681347 |
| N | -2.701018 | -0.762542 | -0.073667 |
| N | -1.845512 | 1.453534  | -0.057679 |
| B | -1.308016 | -0.032551 | 0.040888  |
| C | -1.324751 | 2.651008  | 0.225690  |
| O | -1.869938 | 3.758923  | 0.052993  |
| O | -0.081354 | 2.610134  | 0.780680  |
| H | 0.120171  | 3.541591  | 0.925080  |
| C | -3.090320 | -2.035720 | 0.055744  |
| O | -4.237622 | -2.483203 | -0.145019 |
| O | -2.108773 | -2.884629 | 0.454524  |
| H | -2.562088 | -3.734734 | 0.501542  |
| C | 3.530199  | 2.075425  | -0.248659 |
| H | 2.479134  | 2.386857  | -0.204706 |
| H | 4.074811  | 2.541331  | 0.592953  |
| H | 3.973269  | 2.450785  | -1.188973 |
| C | 2.303378  | -2.849132 | 0.114037  |
| H | 2.607733  | -3.368755 | 1.041068  |

|   |          |           |           |
|---|----------|-----------|-----------|
| H | 1.219547 | -2.629478 | 0.130440  |
| H | 2.550854 | -3.495983 | -0.747597 |

**23. 2COOH – CO – 2NH<sub>2</sub>**

Charge = -2 Multiplicity = 1

|   |           |           |           |
|---|-----------|-----------|-----------|
| C | -4.120782 | -1.688231 | 0.005352  |
| C | -4.699004 | -0.467426 | -0.140298 |
| H | -4.579676 | -2.666321 | 0.020275  |
| H | -5.739035 | -0.198047 | -0.258761 |
| C | 3.234790  | 1.467165  | -0.061393 |
| C | 3.702976  | 0.215330  | -0.130140 |
| H | 3.799859  | 2.386938  | -0.068622 |
| H | 4.730708  | -0.099547 | -0.204359 |
| N | -3.684126 | 0.501847  | -0.099541 |
| N | -2.761319 | -1.550980 | 0.153887  |
| N | 1.843824  | 1.506361  | 0.027815  |
| N | 2.652776  | -0.724202 | -0.088198 |
| C | -0.012903 | -0.589499 | -0.024113 |
| O | -1.168917 | 0.417051  | 0.071395  |
| B | 1.286482  | 0.040319  | -0.012803 |
| B | -2.381968 | -0.149567 | 0.050111  |
| N | -3.926580 | 1.859369  | -0.327879 |
| N | -1.900888 | -2.680486 | 0.261113  |
| H | -4.346313 | 1.981364  | -1.246898 |
| H | -4.581281 | 2.209032  | 0.367328  |
| H | -1.786790 | -2.837768 | 1.264328  |
| H | -0.958553 | -2.205142 | 0.014912  |
| C | 1.252297  | 2.732107  | 0.129531  |

O 1.882279 3.790061 0.156477  
 O -0.075611 2.753943 0.203166  
 H -0.514517 1.856950 0.148707  
 C 2.889292 -2.034408 -0.075019  
 O 2.115205 -2.971670 -0.011942  
 O 4.265025 -2.336398 -0.145022  
 H 4.263368 -3.298721 -0.129939

**24. 1H – CO – 2H**

Charge = -1 Multiplicity = 1

C -3.750933 -0.853707 0.144172  
 C -4.003642 0.480457 0.101204  
 H -4.468634 -1.661968 0.231232  
 H -4.962494 0.984490 0.145723  
 C 1.746991 -0.314079 -0.248111  
 C 3.566012 0.941788 0.288563  
 C 3.947963 -0.348197 0.321103  
 H 4.159050 1.823807 0.510556  
 H 4.922825 -0.755428 0.569305  
 N -2.789509 1.169686 -0.009477  
 N -2.378835 -1.060185 0.060536  
 N 2.277204 1.034322 -0.283643  
 N 2.925510 -1.155298 -0.228214  
 C 0.474751 -0.733789 -0.144263  
 O -0.375352 0.468294 -0.144909  
 H 2.737973 -2.033300 0.242680  
 H 1.624136 1.689890 0.132451  
 H -1.902946 -1.949033 0.065693

H -2.751998 2.172056 -0.071765  
 B -1.696508 0.205724 -0.043402

**25. 1CH<sub>3</sub> – CO – 2CH<sub>3</sub>**

Charge = -1 Multiplicity = 1

C 3.812351 -1.002742 -0.094675  
 C 4.046889 0.332690 -0.015310  
 H 4.534161 -1.809062 -0.179939  
 H 4.997164 0.857197 -0.018712  
 C -1.802111 -0.105464 0.223400  
 C -3.688961 1.171797 -0.001700  
 C -4.080478 -0.115657 0.042506  
 H -4.298864 2.065933 -0.083144  
 H -5.084877 -0.524311 -0.007368  
 N 2.828871 0.998948 0.073971  
 N 2.442745 -1.252644 -0.057110  
 N -2.301837 1.262213 0.242827  
 N -2.987796 -0.923495 0.335612  
 C -0.566814 -0.647160 0.126899  
 O 0.449334 0.389428 0.132209  
 B 1.749098 0.019892 0.055121  
 C 2.715481 2.426971 0.191279  
 H 3.189710 2.944094 -0.658427  
 H 1.650792 2.682204 0.205110  
 H 3.173956 2.801271 1.121424  
 C 1.932466 -2.606393 -0.137104  
 H 2.316880 -3.215515 0.697521  
 H 0.839648 -2.544604 -0.083041

|   |           |           |           |
|---|-----------|-----------|-----------|
| H | 2.239030  | -3.081107 | -1.083685 |
| C | -1.594311 | 2.233945  | -0.573782 |
| H | -0.615924 | 2.449301  | -0.141078 |
| H | -1.444910 | 1.854386  | -1.602174 |
| H | -2.192742 | 3.154902  | -0.609966 |
| C | -2.916500 | -2.280219 | -0.140992 |
| H | -2.624904 | -2.318315 | -1.207760 |
| H | -2.146263 | -2.813882 | 0.425578  |
| H | -3.894978 | -2.759134 | 0.002159  |

**26. 1NH<sub>2</sub> – CO – 2NH<sub>2</sub>**

Charge = -1 Multiplicity = 1

|   |           |           |           |
|---|-----------|-----------|-----------|
| C | -4.068209 | -0.221428 | -0.123295 |
| C | -3.749587 | 1.090359  | 0.035859  |
| H | -5.034045 | -0.698090 | -0.237614 |
| H | -4.397520 | 1.957838  | 0.079978  |
| C | 4.054955  | 0.110244  | -0.178331 |
| C | 3.676512  | -1.166947 | 0.002743  |
| H | 5.047870  | 0.543672  | -0.215766 |
| H | 4.277495  | -2.056134 | 0.154973  |
| N | -2.369554 | 1.219791  | 0.145129  |
| N | -2.885563 | -0.961503 | -0.130286 |
| N | 2.939890  | 0.890860  | -0.500724 |
| N | 2.276445  | -1.285724 | -0.152246 |
| C | 0.528946  | 0.584596  | -0.151011 |
| O | -0.451642 | -0.479359 | 0.001654  |
| B | -1.749119 | -0.073858 | 0.014021  |
| N | -1.865228 | -1.534305 | 0.482827  |

|   |           |           |           |
|---|-----------|-----------|-----------|
| N | -1.764865 | 2.492421  | 0.295032  |
| H | -1.662763 | 2.644736  | 1.300683  |
| H | -0.794251 | 2.310337  | -0.017646 |
| N | -2.903952 | -2.347466 | -0.367319 |
| H | -2.311899 | -2.528873 | -1.177013 |
| H | -2.442360 | -2.803886 | 0.417433  |
| N | 2.925081  | 2.213025  | -0.003833 |
| H | 2.269070  | 2.708912  | -0.605942 |
| H | 2.426764  | 2.171670  | 0.896171  |
| N | 1.690430  | -2.095854 | 0.866893  |
| H | 1.591222  | -1.491704 | 1.693721  |
| H | 0.732545  | -2.244237 | 0.557429  |
| C | 1.774253  | 0.071688  | -0.252341 |

**27. 1COOH – CO – 2COOH**

Charge = -1 Multiplicity = 1

|   |           |           |           |
|---|-----------|-----------|-----------|
| C | 3.472221  | 1.918425  | -0.021549 |
| C | 4.016282  | 0.718887  | -0.275349 |
| H | 3.940541  | 2.894833  | -0.008708 |
| H | 5.040435  | 0.472955  | -0.516903 |
| C | -1.726954 | -0.227322 | -0.128510 |
| C | -3.087887 | -1.571039 | 1.168360  |
| C | -3.833271 | -0.524823 | 0.784396  |
| H | -3.318330 | -2.384939 | 1.843332  |
| H | -4.838895 | -0.250048 | 1.067244  |
| N | 3.016840  | -0.283215 | -0.180406 |
| N | 2.109149  | 1.782195  | 0.288360  |
| N | -3.100599 | 0.241567  | -0.154087 |

C -0.647253 0.566567 -0.281694  
 O 0.529248 -0.216843 0.080081  
 B 1.708148 0.380881 0.106720  
 C -3.637358 1.167873 -0.978677  
 O -3.109086 1.765281 -1.891639  
 O -4.959875 1.402380 -0.652204  
 H -5.229748 2.072447 -1.291159  
 C -1.067444 -2.635896 0.345429  
 O -1.090029 -3.576841 1.124360  
 O -0.312414 -2.587252 -0.764988  
 H 0.597915 -2.846412 -0.543773  
 C 1.380249 2.887233 0.696166  
 O 1.658925 4.030193 0.404362  
 O 0.397357 2.541650 1.534624  
 H -0.241407 3.265754 1.542218  
 C 3.255869 -1.602040 -0.418197  
 O 2.462584 -2.518329 -0.338878  
 O 4.553232 -1.836350 -0.761401  
 H 4.601368 -2.790977 -0.899489

**28. 1CHO – CO – 2CHO**

Charge = -1 Multiplicity = 1

C -3.671524 1.364120 -0.071104  
 C -4.000502 0.060949 -0.082896  
 H -4.307416 2.240075 -0.070120  
 H -4.975867 -0.409154 -0.089073  
 C 1.838036 -0.092750 0.034835  
 C 3.484350 -1.557192 -0.677374

C 4.068777 -0.360096 -0.536078  
 H 3.900712 -2.485388 -1.050156  
 H 5.076165 -0.034607 -0.758864  
 N -2.828430 -0.719512 -0.073800  
 N -2.265354 1.516280 -0.056183  
 N 2.152255 -1.492675 -0.204185  
 N 3.143741 0.531419 0.017840  
 C 0.688497 0.607569 0.030084  
 O -0.412677 -0.285745 -0.115402  
 B -1.663375 0.175777 -0.071799  
 C 3.450447 1.784992 0.435975  
 O 4.559998 2.291042 0.307692  
 H 2.584883 2.291435 0.892189  
 C 1.499074 -2.614321 0.213560  
 O 0.486669 -2.685252 0.883137  
 H 2.025247 -3.523988 -0.147691  
 C -2.819675 -2.093252 -0.008082  
 O -3.827552 -2.775729 -0.018890  
 H -1.796632 -2.503036 0.068683  
 C -1.678362 2.771664 -0.047062  
 O -2.329154 3.799953 -0.055915  
 H -0.578691 2.712945 -0.027797

**29. 1NO<sub>2</sub> – CO – 2NO<sub>2</sub>**

Charge = -1 Multiplicity = 1

C -3.216479 1.598150 0.468742  
 C -3.829531 0.433820 0.214196  
 H -3.597727 2.486698 0.950213

H -4.842554 0.123808 0.423654  
 C 1.622673 -0.415078 -0.567043  
 C 2.592977 -2.088452 0.722404  
 C 3.563361 -1.553159 -0.025699  
 H 2.611615 -2.956515 1.366599  
 H 4.592443 -1.864235 -0.139482  
 N -2.923297 -0.427085 -0.429815  
 N -1.896634 1.554308 -0.013663  
 N 1.397006 -1.349260 0.529292  
 N 3.056966 -0.445996 -0.753377  
 C 0.764878 0.056199 -1.496082  
 O -0.550561 -0.361482 -1.147810  
 B -1.580163 0.218182 -0.591283  
 N 0.684485 -1.028032 1.660119  
 O 0.814008 -1.775053 2.622123  
 O -0.079438 -0.081438 1.604998  
 N 3.833034 0.717673 -0.675510  
 O 3.286799 1.775238 -0.848624  
 O 5.037043 0.540228 -0.520529  
 N -3.299667 -1.694532 -0.766879  
 O -4.447955 -2.022529 -0.495507  
 O -2.474692 -2.393892 -1.311671  
 N -1.034154 2.586870 0.283335  
 O -1.493097 3.506442 0.946691  
 O 0.086094 2.504088 -0.146944

**30. 1NO<sub>2</sub> – CO – 2CH<sub>3</sub>**

Charge = -1 Multiplicity = 1

C -4.373208 -1.231544 0.077579  
 C -4.591056 0.102355 -0.053200  
 H -5.099502 -2.037615 0.092502  
 H -5.532873 0.627585 -0.173018  
 C 1.208100 -0.198830 0.200466  
 C 2.783133 1.237237 1.129411  
 C 3.331009 0.016523 1.107151  
 H 3.153661 2.155249 1.565077  
 H 4.271622 -0.323850 1.516883  
 N -3.368386 0.765385 -0.020562  
 N -3.006331 -1.481883 0.198510  
 N 1.525503 1.193564 0.482437  
 N 2.458172 -0.885084 0.445135  
 C -0.003881 -0.808587 0.211974  
 O -1.004682 0.164342 0.231020  
 B -2.320072 -0.213661 0.141681  
 N 1.234911 2.226212 -0.381496  
 O 1.735335 3.318691 -0.109758  
 O 0.458671 2.013369 -1.285605  
 N 3.057506 -1.706671 -0.503430  
 O 2.367677 -2.160707 -1.383764  
 O 4.240523 -1.980409 -0.305691  
 C -3.223007 2.190951 -0.183363  
 H -3.675819 2.743322 0.654613  
 H -2.153532 2.422884 -0.225699  
 H -3.690189 2.532802 -1.119051  
 C -2.504877 -2.832678 0.356968

H -1.412142 -2.787255 0.365490  
H -2.868920 -3.274234 1.297817  
H -2.839048 -3.466111 -0.478729

**31. 1NO<sub>2</sub> – CO – 2NH<sub>2</sub>**

Charge = -1 Multiplicity = 1

C 4.302540 -1.330914 -0.028322  
C 4.642408 -0.021686 -0.160406  
H 4.935647 -2.208199 0.028691  
H 5.617029 0.445221 -0.230304  
C -1.177664 -0.137489 -0.245547  
C -2.780579 1.355162 -1.013013  
C -3.293276 0.127180 -1.148890  
H -3.171292 2.308329 -1.342561  
H -4.217239 -0.186674 -1.614235  
N 3.470796 0.731724 -0.218366  
N 2.916016 -1.444918 0.018930  
N -1.527206 1.268507 -0.357099  
N -2.401211 -0.825873 -0.592458  
C 0.052321 -0.701862 -0.290763  
O 1.030212 0.293049 -0.172001  
B 2.329642 -0.142004 -0.119091  
N 3.511698 2.130581 -0.361994  
H 2.975039 2.369444 -1.194222  
H 2.996189 2.534478 0.418760  
N 2.300379 -2.712066 0.161731  
H 2.155821 -2.854312 1.163193  
H 1.348082 -2.556127 -0.195962

N -1.311853 2.170707 0.671339  
O -0.567716 1.846600 1.566849  
O -1.841737 3.272973 0.540804  
N -2.984027 -1.776499 0.238956  
O -4.160274 -2.045398 0.005238  
O -2.283500 -2.327177 1.053668

**32. 1CHO – CO – 2CH<sub>3</sub>**

Charge = -1 Multiplicity = 1

C -4.078445 -1.518942 0.146470  
C -4.420500 -0.209835 0.286584  
H -4.676396 -2.410678 0.293323  
H -5.362930 0.236156 0.580908  
C 2.857630 1.525464 -0.679031  
C 3.485252 0.346851 -0.578748  
H 3.239057 2.484375 -1.000426  
H 4.511675 0.079730 -0.790934  
N -3.310430 0.572607 -0.026586  
N -2.748772 -1.604445 -0.258187  
N 1.518016 1.368587 -0.245002  
N 2.590456 -0.619379 -0.091529  
C 0.110799 -0.742605 -0.367460  
O -0.937671 0.176502 -0.619539  
N -3.295266 1.963448 0.202201  
N -2.102359 -2.855149 -0.400764  
H -2.421539 2.161655 0.695866  
H -3.192909 2.418895 -0.703802  
H -1.115477 -2.635297 -0.195776

|   |           |           |           |
|---|-----------|-----------|-----------|
| H | -2.095452 | -3.068470 | -1.399302 |
| C | 0.798956  | 2.365014  | 0.322207  |
| O | -0.191010 | 2.286212  | 1.024179  |
| O | 1.331802  | 3.594479  | -0.000944 |
| H | 0.754657  | 4.220602  | 0.451692  |
| C | 3.040667  | -1.819008 | 0.339794  |
| O | 4.208668  | -2.189267 | 0.251404  |
| O | 2.083473  | -2.591528 | 0.889869  |
| H | 2.547879  | -3.394735 | 1.157120  |
| C | 1.249106  | -0.060472 | -0.132949 |
| B | -2.194593 | -0.280378 | -0.346109 |

**33. 1CHO – CO – 2NH<sub>2</sub>**

Charge = -1 Multiplicity = 1

|   |           |           |           |
|---|-----------|-----------|-----------|
| C | 4.055581  | -1.288067 | 0.042160  |
| C | 4.401823  | 0.015184  | -0.124014 |
| H | 4.682455  | -2.170811 | 0.081754  |
| H | 5.376738  | 0.470493  | -0.246738 |
| C | -3.349391 | 1.252106  | 0.141467  |
| C | -3.776400 | -0.014347 | 0.056647  |
| H | -3.895978 | 2.179644  | 0.240789  |
| H | -4.776317 | -0.426677 | 0.064598  |
| N | 3.236471  | 0.781435  | -0.129810 |
| N | 2.672337  | -1.386020 | 0.161670  |
| N | -1.942703 | 1.274924  | 0.070751  |
| N | -2.672686 | -0.864439 | -0.072074 |
| C | -0.217868 | -0.639709 | -0.026015 |
| O | 0.796289  | 0.365889  | 0.033853  |

|   |           |           |           |
|---|-----------|-----------|-----------|
| B | 2.088081  | -0.079404 | 0.033380  |
| N | 3.287371  | 2.171093  | -0.336508 |
| N | 2.049591  | -2.646275 | 0.333724  |
| O | -3.845043 | -2.808754 | -0.264358 |
| O | -1.793928 | 3.543781  | 0.186642  |
| H | 2.715493  | 2.387119  | -1.151664 |
| H | 2.829624  | 2.623238  | 0.452947  |
| H | 1.079669  | -2.465799 | 0.035348  |
| H | 1.964103  | -2.792208 | 1.341596  |
| C | -1.248243 | 2.445556  | 0.091111  |
| C | -2.775838 | -2.204866 | -0.243110 |
| H | -0.163167 | 2.304710  | 0.016357  |
| H | -1.791147 | -2.684330 | -0.356927 |
| C | -1.445181 | -0.090974 | -0.019633 |

**34. 1COOH – CO – 2CH<sub>3</sub>**

Charge = -1 Multiplicity = 1

|   |           |           |           |
|---|-----------|-----------|-----------|
| C | 4.186270  | -1.481846 | -0.047159 |
| C | 4.526983  | -0.176262 | -0.201970 |
| H | 4.840161  | -2.343883 | 0.038770  |
| H | 5.516862  | 0.263436  | -0.269772 |
| C | -1.293263 | -0.025858 | -0.029192 |
| C | -2.785199 | 1.557150  | -0.845963 |
| C | -3.410657 | 0.373082  | -0.886516 |
| H | -3.099416 | 2.528995  | -1.202106 |
| H | -4.375020 | 0.100542  | -1.293141 |
| N | 3.366044  | 0.586953  | -0.275129 |
| N | 2.798491  | -1.613873 | -0.013569 |

N -1.563254 1.403369 -0.155812  
 N -2.617774 -0.592834 -0.237899  
 C -0.138063 -0.713307 -0.146366  
 O 0.949154 0.189870 -0.196418  
 B 2.221698 -0.294712 -0.160366  
 C 3.355693 2.018598 -0.426646  
 H 3.849160 2.331319 -1.360215  
 H 2.311647 2.348163 -0.455159  
 H 3.860254 2.519183 0.414961  
 C 2.174460 -2.910956 0.157460  
 H 1.090006 -2.761276 0.169043  
 H 2.443285 -3.582520 -0.673104  
 H 2.502737 -3.374749 1.101100  
 C -1.011640 2.454545 0.492750  
 O -1.294588 3.629957 0.275582  
 O -0.111787 2.103029 1.437377  
 H 0.206044 2.943754 1.788629  
 C -3.133829 -1.790972 0.105908  
 O -4.256822 -2.178449 -0.211159  
 O -2.304839 -2.551186 0.853089  
 H -2.812241 -3.355516 1.018088

**35. 1COOH – CO – 2NH<sub>2</sub>**

Charge = -1 Multiplicity = 1

C -4.078445 -1.518942 0.146470  
 C -4.420500 -0.209835 0.286584  
 H -4.676396 -2.410678 0.293323  
 H -5.362930 0.236156 0.580908

C 2.857630 1.525464 -0.679031  
 C 3.485252 0.346851 -0.578748  
 H 3.239057 2.484375 -1.000426  
 H 4.511675 0.079730 -0.790934  
 N -3.310430 0.572607 -0.026586  
 N -2.748772 -1.604445 -0.258187  
 N 1.518016 1.368587 -0.245002  
 N 2.590456 -0.619379 -0.091529  
 C 0.110799 -0.742605 -0.367460  
 O -0.937671 0.176502 -0.619539  
 N -3.295266 1.963448 0.202201  
 N -2.102359 -2.855149 -0.400764  
 H -2.421539 2.161655 0.695866  
 H -3.192909 2.418895 -0.703802  
 H -1.115477 -2.635297 -0.195776  
 H -2.095452 -3.068470 -1.399302  
 C 0.798956 2.365014 0.322207  
 O -0.191010 2.286212 1.024179  
 O 1.331802 3.594479 -0.000944  
 H 0.754657 4.220602 0.451692  
 C 3.040667 -1.819008 0.339794  
 O 4.208668 -2.189267 0.251404  
 O 2.083473 -2.591528 0.889869  
 H 2.547879 -3.394735 1.157120  
 C 1.249106 -0.060472 -0.132949  
 B -2.194593 -0.280378 -0.346109
